1 **Suppression of GABAergic transmission in the spinal dorsal horn induces pain-related**  
2 **behavior in a chicken model of spina bifida**

3

4 Md. Sakirul I Khan<sup>1\*</sup>, Hiroaki Nabeka<sup>1</sup>, Farzana Islam<sup>1</sup>, Tetsuya Shimokawa<sup>1</sup>, Shouichiro Saito<sup>2</sup>,  
5 Tetsuya Tachibana<sup>3</sup>, Seiji Matsuda<sup>1</sup>

6

7

8

9

10 <sup>1</sup>Department of Anatomy and Embryology, Graduate School of Medicine, Ehime University,  
11 Toon 791-0295, Ehime, Japan

12 <sup>2</sup>Laboratory of Veterinary Anatomy, Faculty of Applied Biological Sciences, Gifu University,  
13 Yanagido, 501-1193, Gifu, Japan

14 <sup>3</sup>Department of Agrobiological Science, Faculty of Agriculture, Ehime University, Matsuyama  
15 790-8566, Japan

16

17

18 \* **Correspondence should be addressed to:** Md. Sakirul Islam Khan, MS, PhD

19 Department of Anatomy and Embryology

20 Ehime University Graduate School of Medicine

21 Toon 791-0295, Ehime, Japan

22 Tel.: 81-89-960-5231

23 Fax: 81-89-960-5233

24 E-mail: sakirul@m.ehime-u.ac.jp

25

26 Running title: **Spinal GABAergic transmission and spina bifida-related pain**

27 **Abstract**

28 Spina bifida aperta (SBA), one of the most common congenital malformations, causes various  
29 neurological disorders. Pain is a common complaint of patients with SBA. However, little is  
30 known about the neuropathology of SBA-related pain. Because loss of  $\gamma$ -aminobutyric acid  
31 (GABA)ergic neurons in the spinal cord dorsal horn is associated with pain, we hypothesized the  
32 existence of cross-talk between SBA-related pain and alterations in GABAergic transmission in  
33 the spinal cord. Therefore, we investigated the kinetics of GABAergic transmission in the spinal  
34 cord dorsal horn in a chicken model of SBA. Neonatal chicks with SBA exhibited various pain-  
35 like behaviors, such as an increased number of vocalizations with elevated intensity (loudness)  
36 and frequency (pitch), reduced mobility, difficulty with locomotion, and escape reactions.  
37 Furthermore, the chicks with SBA did not respond to standard toe-pinching, indicating disruption  
38 of the spinal cord sensorimotor networks. These behavioral observations were concomitant with  
39 loss of GABAergic transmission in the spinal cord dorsal horn. We also found apoptosis of  
40 GABAergic neurons in the superficial dorsal horn in the early neonatal period, although cellular  
41 abnormalization and propagation of neurodegenerative signals were evident at middle to  
42 advanced gestational stages. In conclusion, ablation of GABAergic neurons induced alterations  
43 in spinal cord neuronal networks, providing novel insights into the pathophysiology of SBA-  
44 related pain-like complications.

45

46 **Keywords:** Spina bifida, Chicken model, Pain-related behavior, GABAergic transmission,  
47 Apoptosis

## 48 **Introduction**

49 Spina bifida aperta (SBA), a neural-tube defect (NTD) that causes lifelong neurological  
50 complications, develops in approximately 1 in 1,000 neonates worldwide [1]. SBA is primarily  
51 characterized by defective fusion of the neural tube, which causes *in utero* deformities in the  
52 exposed spinal [2–5]. Such spinal cord deformities lead to varying degrees of motor and/or  
53 sensory deficits, resulting in neurological disorders such as spinal ataxia, paralysis of the legs,  
54 problems with bowel and bladder control, and pain complications [5–8]. NTD-induced pain is a  
55 common complaint of SBA patients of any age [8–10]. Individuals with SBA frequently have  
56 various risk factors for pain, such as musculoskeletal deformities, clogged/infected shunts, urinary  
57 tract infections, bowel problems, and suboptimal positioning [11,12]. However, little is known  
58 about the pathophysiology of pain in SBA. Thus, research in animal models of SBA is needed to  
59 better understand the underlying cellular and molecular mechanisms and to develop novel  
60 therapeutic interventions.

61 The pain experienced by people with NTD may be nociceptive or neuropathic or a  
62 combination thereof [8]. A loss of inhibitory transmission in the spinal cord dorsal horn is  
63 important in the development of chronic pain. Spinal cord injury-induced loss of  $\gamma$ -aminobutyric  
64 acid (GABA)ergic neurons, the principle inhibitory interneurons, in the superficial dorsal horn  
65 causes persistent pain [13–18]. These facts led us to postulate the existence of cross-talk between  
66 SBA-related pain complications and alteration in GABAergic transmission in the spinal cord  
67 dorsal horn. Accordingly, we explored the kinetics of GABAergic transmission in the spinal cord  
68 dorsal horn from gestation to post-hatching in a chicken model of SBA to obtain  
69 pathophysiological data on the sequence of events associated with SBA-like neurological  
70 disorders [19–21].

71

## 72 **Materials and Methods**

## 73 ***Animals***

74 The fertilized eggs of chickens (*Gallus gallus*; Mori Hatchery, Kagawa, Japan) were incubated in  
75 a commercial incubator (Showa Furanki, Saitama, Japan) at  $37.8 \pm 0.2^\circ\text{C}$  with 60% relative  
76 humidity to obtain embryos at developmental stages 17–21 inclusive on gestational days 2.5–3.5.  
77 The developmental stage of each embryo was determined using the developmental table of  
78 Hamburger and Hamilton [22]. The embryos were divided into two groups: the SBA group, in  
79 which the roof plate of the neural tube was incised; and the normal control group, in which the  
80 neural tube was left intact. The hatched chicks were raised in a room maintained at  $30^\circ\text{C}$  with  
81 continuous illumination and were fed a commercial diet (crude protein, 24%; metabolizable  
82 energy, 3,050 kcal/kg; Toyohashi Feed Mills Co. Ltd., Toyohashi, Japan) with water available *ad*  
83 *libitum*. Because neonatal SBA chicks have difficulty consuming food, they were gavaged a feed  
84 slurry (tube feeding) at a mass of 4.0% of their body weight into the crop four times daily. The  
85 feed slurry was made by mixing 40% powdered diet with 60% distilled water on a weight basis.  
86 The animal experimental protocols were approved by the Committee on the Ethics of Animal  
87 Experiments of the Ehime University Graduate School of Medicine, Toon, Japan (No. 05A27-  
88 10).

## 89 ***Surgical manipulation to generate SBA chicks***

90 To produce SBA chicks, surgical manipulation of the neural plate was carried out as described  
91 previously [19, 21]. Briefly, the eggshell and amnion were opened and placed under a  
92 stereomicroscope to determine the developmental stage of the embryo. Next, the roof plate of the  
93 neural tube was incised longitudinally, starting at the level of the cranial margin of the 26th somite,  
94 which forms the sixth and seventh thoracic segments, using a custom-made microknife [23, 24].  
95 The incision extended caudally for a distance equivalent to the length of seven somites and was  
96 made by inserting the microknife into the neural tube to approximately half the depth of the tube.  
97 The roof plate was incised, and care was taken not to damage other parts of the neural tube. After

98 the incision was made and the surgical manipulation was complete, the shell window was closed  
99 using transparent adhesive tape and the eggs were re-incubated at  $37.8 \pm 0.2^\circ\text{C}$  with 60% relative  
100 humidity.

### 101 ***Behavioral assessments***

102 For behavioral assessments, the SBA and control chicks used at postnatal day (PD)-0 were also  
103 used at PD-2, PD-4, and PD-10. To characterize pain-related behavioral changes, the spontaneous  
104 activities of the normal and SBA chicks were videotaped at 08:00 and 20:00 for 30 min at PD-0,  
105 PD-2, PD-4, and PD-10 and scored offline. The intensity and number of vocalizations, the primary  
106 indicators of pain in birds [25, 26] were characterized by two independent observers. The intensity  
107 of vocalization (Frequency Analyzer 2.0; free software), and number of vocalizations per 10 min  
108 were assessed in the SBA and normal chicks.

109 To elicit a sensorimotor reaction, forceps were used to conduct a standard pinch test of the  
110 toes on both legs of the normal and SBA chicks; the tests were repeated three times per chick.  
111 The results were considered conclusive and a normal reaction was recorded only if an identical  
112 response was obtained on at least three toes in each leg in three consecutive tests. The reactions  
113 of the chicks were videotaped and the leg withdrawal reflex, jumping, and vocalization behaviors  
114 were scored offline by two independent observers. Behavior was analyzed in six chicks per group  
115 at each age.

### 116 ***Sample collection and tissue preparation***

117 Spinal cord sections from the open defect area (lumbosacral region) from SBA chicks, and from  
118 a similar location in the normal chicks, were collected on embryonic day (ED)-14, ED-18, PD-2,  
119 PD-4, and PD-10. The incisions of the roof plates of the neural tubes of SBA embryos were  
120 confirmed by observing open defects on the backs of the chicks, and the induction of SBA in the  
121 chicks post-hatching was confirmed by observing open defects on the backs of the chicks with  
122 leg dysfunction ([21]; Fig. 1a; Suppl. Video 1). Six chicks from each group at each age were

123 transcardially perfused with a fixative solution containing 4% paraformaldehyde with 0.5%  
124 glutaraldehyde in 0.1 M phosphate-buffered saline (PBS). Next, the spinal cord was removed  
125 from the location of the open defect (exposed area, lesion location). Spinal tissue samples from  
126 the normal control chicks were collected from locations similar to the tissue collection locations  
127 of SBA chicks. The collected tissues were immersed in 4% paraformaldehyde overnight at 4°C,  
128 dehydrated, and embedded in paraffin.

### 129 *Immunohistochemical staining*

130 The avidin-biotin complex method was used to analyze GABAergic immunoreactivities. Briefly,  
131 spinal cord sections (7 µm) from the location of the open defect (exposed area) of the lumbosacral  
132 cord in the SBA chicks, and from a similar location in the normal chicks, were deparaffinized,  
133 rehydrated, and treated with PBS containing 10% methanol and 3% hydrogen peroxide (H<sub>2</sub>O<sub>2</sub>)  
134 for 10 min. After rinsing with PBS, the spinal cord sections were treated with 5% bovine serum  
135 albumin, 1% normal goat serum, 0.1% fish gelatin, and 0.1% NaN<sub>3</sub> in PBS for 1 h followed by  
136 incubation with the primary antibodies, rabbit polyclonal anti-GABA (1:1,500; Sigma, St. Louis,  
137 MO) overnight at 4°C, or mouse monoclonal anti-parvalbumin (PV) (1:500; Sigma), mouse  
138 monoclonal anti-calbindin-D-28K (CB), or mouse monoclonal anti-calretinin (CR) (1:500;  
139 SWANT, Bellinzona, Switzerland) for 60 h at 4°C. Next, the sections were washed three times  
140 for 10 min each in PBS and reacted with the secondary antibodies for 2 h at room temperature.  
141 After rinsing three times for 10 min each in PBS, the avidin-biotin-peroxidase complex (1:300;  
142 Dako, Glostrup, Denmark) was applied for 1 h at room temperature. The sections were immersed  
143 in 3,3-diaminobenzidine (DAB) (Sigma) containing 0.0033% H<sub>2</sub>O<sub>2</sub> for approximately 10 min.  
144 After rinsing with distilled water, the sections were dehydrated, mounted, and visualized under a  
145 light microscope (Nikon, Tokyo, Japan).

146 Antibody specificity was tested using a negative staining procedure with normal rabbit IgG  
147 (1:250; Dako, Glostrup, Denmark) instead of the primary antibodies; the samples were processed

148 as described above. There was a lack of non-specific staining (data not shown).

#### 149 ***Quantitative analysis of GABAergic neurons***

150 For quantitative analysis of GABA-expressing neurons, serial coronal sections (7  $\mu$ m) from the  
151 location of the open defect (exposed area) of the lumbar cord in the SBA chicks, and from a  
152 similar location in the normal chicks, were stained with a rabbit polyclonal anti-GABA antibody  
153 (1:1,500; Sigma). The tissues were observed under a Nikon Eclipse E800 light microscope, and  
154 images were acquired using a charge-coupled device (CCD) camera attached to the microscope  
155 (Nikon Digital Sight DS-L2). For analysis of GABA-expressing neurons, all GABA-  
156 immunopositive cells with a rounded profile in superficial dorsal horn laminae I–III were  
157 considered and counted. The total number of neurons in the superficial dorsal horn on each side  
158 of the spinal cord was calculated and averaged across six cross sections per chick at each age;  
159 each group comprised six chicks of each age.

160 For quantitative analysis of PV-, CB-, and CR-expressing neurons, serial coronal sections  
161 were stained with mouse monoclonal anti-PV (1:500; Sigma), mouse monoclonal anti-CB, or  
162 mouse monoclonal anti-CR (1:500; SWANT) antibody, and PV-, CB-, and CR-immunopositive  
163 cells were enumerated as described above.

#### 164 ***Measurement of staining intensity***

165 The GABAergic immunoreactivities in the dorsal horn lamina I–III of the open defect in the spinal  
166 cord of SBA chicks, and at a similar location in normal chicks, were measured using ImageJ  
167 software (National Institutes of Health, Bethesda, MD, USA). To correct for background, three  
168 background intensity readings were taken per image. These readings were averaged and  
169 subtracted from the signal intensity to yield the protein staining intensity. The intensity data are  
170 presented as the mean  $\pm$  SEM. Six random sections per chick at each age in each group were  
171 analyzed for quantification; each group comprised six chicks of each age.

#### 172 ***Immunofluorescence staining***

173 Immunofluorescence staining was performed as described previously [21]. For double  
174 immunofluorescence staining, the sections were incubated for 60 h at 4°C in a solution containing  
175 rabbit polyclonal anti-GABA (1:3,000; Sigma) plus mouse monoclonal anti-CB or mouse  
176 monoclonal anti-CR (1:1000; SWANT) antibodies; and rabbit polyclonal anti-caspase 3 (1:1000;  
177 Bioss) plus mouse monoclonal anti-CB (1:1000; SWANT) antibodies. After washing in PBS, the  
178 sections were treated for 2 h at room temperature with an Alexa Fluor 546-conjugated goat anti-  
179 rabbit IgG (H+L) (1:1,000; Invitrogen) or an Alexa Fluor 488-conjugated goat anti-mouse IgG  
180 (H+L) (1:1,000; Invitrogen) and 4',6-diamidino-2-phenylindole (DAPI), washed with PBS,  
181 mounted with Vectashield (Vector Laboratories), and visualized using a Nikon A1 confocal  
182 microscope equipped with a 100× objective lens (Nikon).

### 183 ***Statistical analysis***

184 Statistical analysis was performed on the mean values and data are reported as the mean ± SEM.  
185 The data were subjected to two-way analysis of variance (ANOVA) with the Tukey–Kramer *post*  
186 *hoc* test, and *P*-values < 0.05 were considered to indicate statistical significance.

## 187 **Results**

### 188 ***Assessment of behavioral disorders***

189 Various neurological complications were evident in neonatal chicks with SBA (Suppl. Video 1).  
190 Difficulty during locomotion (Fig. 1a) and increased numbers of vocalizations (Fig. 1b), with  
191 greater intensity (loudness) and frequency (pitch; Fig. 1c), were observed in SBA chicks  
192 compared with control chicks during the early neonatal period. Chicks with SBA also showed  
193 reduced confidence in mobility, escape reactions, anxiety, fear or restlessness, and inappetence.  
194 These behavioral changes are considered primary indicators of pain in birds [25, 26], indicating  
195 that the chicks with SBA experienced pain.

196 The sensorimotor reactions of the chicks are summarized in Table 1. In normal chicks, toe-  
197 pinching resulted in withdrawal of the limb, jumping, and vocalization (Supplementary Video 2).



198 The responses were consistent in control chicks at PD-0, PD-2, PD-4, and PD-10; therefore, the  
199 pattern was considered a normal sensorimotor reaction. In the first few hours after hatching (PD-  
200 0), toe-pinching elicited relatively normal reactions in SBA chicks compared to age-matched  
201 control chicks. However, commencing on PD-2, the sensorimotor reactions gradually decreased;  
202 there was almost no response at PD-10 (Table 1; Supplementary Video 1), indicating disruption  
203 of the sensorimotor networks in the chicks with SBA.

#### 204 ***Expression of GABA in the dorsal horn of the spinal cord***

205 The GABA immunoreactivity in exposed spinal cord in embryonic and neonatal chicks is shown  
206 in Fig. 2. GABA immunoreactivity was detected in the spinal cord, predominantly in dorsal horn  
207 laminae I–III. Such GABA immunoreactivity in avian species is in line with mammalian studies  
208 of GABA distribution in the spinal cord [27]. GABA immunoreactivity was higher in SBA chicks  
209 than in normal chicks at the embryonic stage (ED-14). In contrast, GABA immunoreactivity was  
210 lower in SBA chicks at the neonatal stage (PD-4) compared to not only age-matched normal  
211 chicks but also SBA chicks at the embryonic stage. In fact, at ED-14, GABA expression was  
212 significantly higher in SBA chicks than in age-matched control chicks, whereas the opposite  
213 pattern was evident at PD-4 (Fig. 2i). At ED-14, the number of GABA-immunopositive cells was  
214 significantly higher in dorsal horn laminae I–III of SBA chicks than in the control chicks, but the  
215 number decreased at PD-4 (Fig. 2j).

#### 216 ***Expression of calcium-binding GABAergic subpopulations in the spinal cord dorsal horn***

217 Figures 3, 4, and 5 show the immunoreactivities of the PV, CR, and CB calcium-binding  
218 GABAergic subpopulations, respectively. PV-positive neurons were predominantly detected in  
219 the ventral horn area, but also in the dorsal horn (Fig. 3). The overall density of PV-  
220 immunopositive fibers in the spinal cord increased with increasing developmental stage in the  
221 normal chicks (Fig. 3a–d) but not in the SBA chicks (Fig. 3e–h). Similarly, the number of PV-  
222 positive neurons in dorsal horn laminae I–III at ED-14 was greater in SBA chicks than in normal

223 chicks; however, after hatching (at P4), the opposite pattern was evident (Fig. 3j). PV  
224 immunoreactivity at ED-14 was significantly greater in the SBA chicks than in age-matched  
225 control chicks; the opposite pattern was evident at the neonatal stage (Fig. 3i).

226 CR immunoreactivity in the spinal cord of the SBA and normal chicks is shown in Fig. 4.  
227 A few intensely labeled CR-immunopositive cells were observed in both the normal and SBA  
228 chicks at the embryonic stage, and this was relatively prominent in dorsal horn laminae I–III of  
229 the SBA chicks. Although the CR immunoreactivity of cells and fibers increased in the spinal  
230 cords of neonatal normal chicks (Fig. 4a–d), CR immunoreactivity was lower in SBA chicks at  
231 PD-4 (Fig. 4e–h). Additionally, the number and staining intensity (Fig. 4i, j) of CR-expressing  
232 neurons in dorsal horn laminae I–III at PD-4 were significantly reduced in SBA chicks compared  
233 to the control chicks.

234 CB immunoreactivity in the spinal cords of SBA and normal chicks is shown in Figure 5.  
235 CB-immunopositive cells were detected in the dorsal and ventral horns of the spinal cord. In the  
236 ventral horn, strongly CB-immunoreactive small neurons were distributed in lamina VII of both  
237 the normal and SBA chicks; in mammals, these are reportedly Renshaw cells [28, 29]. The number  
238 and staining intensity of CB-immunopositive cell bodies and fibers differed between the control  
239 and SBA chicks (Fig. 5i, j). In the SBA chicks, the number of CB-immunopositive cells in laminae  
240 I–III during the embryonic stage was higher than in normal chicks. However, post-hatching, the  
241 number and immunoreactivities of CB-immunopositive neurons were lower in SBA chicks than  
242 in normal chicks.

#### 243 ***GABAergic transmission in the dorsal horn of the spinal cord***

244 To determine whether GABAergic neurons were colocalized in spinal cord dorsal horn and the  
245 pain-like behavior exhibited by SBA chicks was associated with alterations in GABAergic  
246 transmission, double immunofluorescence staining of GABA and CB or CR in dorsal horn  
247 laminae I–III of the spinal cord was performed at ED-14 to PD-10. Double staining of GABA and

248 CB (Fig. 6a, b, e, f) or CR (Fig. 6i, j, m, n) increased during the later stages of the embryonic  
249 period. This staining was very strong at ED-18 (Fig. 6f, n), but decreased after PD-4 (Fig. 6g, h,  
250 o, p), the time point at which the SBA chicks showed severe pain-like behavioral changes (Fig.  
251 1, Suppl. Video 1).

### 252 *Neurodegeneration in the spinal cord*

253 To clarify the mechanisms underlying the loss of GABAergic neurons in SBA chicks, the  
254 immunoreactivity of caspase-3, a marker of apoptosis, in CB-expressing neurons was evaluated  
255 in the dorsal horn laminae I–III of the spinal cord (Fig. 7). In SBA chicks, weak caspase-3  
256 immunoreactivity was evident in CB-expressing neurons at ED-18 (Fig. 7v), and moderate to high  
257 caspase-3 immunoreactivity was found at PD-2 and PD-4 (Fig. 7vi and vii). However, most of  
258 these GABAergic neurons in the dorsal horn had likely degenerated by PD-10, because only a  
259 few interneuron-like structures remained at this point (Fig. 7viii), suggesting that the degeneration  
260 of GABAergic neurons in the dorsal horn of the exposed cord of the SBA chicks was due to  
261 apoptosis. In addition to the GABAergic neurons, strong caspase-3 immunoreactivity was  
262 observed in the tissue of the exposed cord in the SBA chicks at P4 (Fig. 7vii), suggesting that the  
263 loss of tissue area may also be due to apoptosis.

### 264 **Discussion**

265 Chicks with SBA-like features showed various neurological complications, including pain-related  
266 behavior (Fig. 1 and Suppl. Video 1) and motor dysfunction [21], consistent with reports of human  
267 neonates with SBA [6, 8, 10]. Therefore, pathological characterization of spinal motor networks  
268 of SBA chicks would provide insight into the progression of SBA-like neurological  
269 complications.

270 Spinal cord injury-induced pain complications are due in part to neuronal dysfunction in the  
271 spinal cord characterized by decreasing inhibitory controls [30–33]. In fact, loss of spinal cord  
272 dorsal horn inhibitory circuits, many of which involve interneurons that express GABA and its

273 subpopulations, is a major contributor to persistent pain [13–18]. In this study, GABA- and PV-,  
274 CB-, and CR-expressing neurons were lost, and the expression levels of these factors were  
275 reduced in the exposed spinal cord dorsal horns of SBA chicks at the neonatal stage (Figs. 2–6).  
276 Therefore, reduction in GABAergic transmission in the spinal cord dorsal horn may have  
277 disrupted the inhibitory networks and contributed to the increased pain exhibited by SBA chicks.  
278 This was supported by the abnormal sensory projections in the dorsal funiculi of SBA chicks [20],  
279 which is the main route of inhibitory pain pathways in the spinal cord [34]. Although it is not  
280 possible to quantify pain in chicks, our behavioral observations suggested that the SBA chicks  
281 experienced persistent pain. The SBA chicks produced an increased number of loud vocalizations  
282 (Fig. 2b, c) and exhibited reduced confidence in mobility, escape reactions, anxiety, fear or  
283 restlessness, and struggling to change position (Suppl. video 1), major indicators of pain in birds  
284 [25, 26]. Thus, suppression of GABAergic transmission in the superficial dorsal horn may cause  
285 SBA-related pain.

286 Our findings also support a possible correlation between the loss of GABAergic neurons  
287 and neurological disorders in SBA patients, because intrathecal treatment with a GABA agonist  
288 relieves SBA-induced pain and spasticity in humans [35]. This also indicates that the reduction in  
289 spinal GABAergic transmission in the motor neuron area observed in our previous study  
290 contributed to leg movement dysfunction in the SBA chicks [21]. The loss of GABAergic  
291 transmission from the dorsal and ventral horn is also supported by the decreased or absent  
292 sensorimotor function in neonatal SBA chicks (Table 1). Taken together, these findings provide  
293 strong pathophysiological evidence that the loss of GABAergic transmission leads to varying  
294 degrees of motor and/or sensory deficits in the spinal cord, and that this contributed to various  
295 neurological complications, particularly leg movement dysfunction and pain, in SBA chicks.

296 Neuronal loss due to apoptosis is an important pathophysiological component of many  
297 neurological diseases [36–38]. The loss of spinal neurons at lesion sites may be associated with

298 SBA-related neurological dysfunctions [39]. In fact, Kowitzk *et al.* suggested that neurons in  
299 neonatal myelomeningoceles undergo degeneration by apoptosis [40]. Apoptosis-induced  
300 degeneration of GABAergic interneurons and motor neurons in the lumbar cord ventral horn area  
301 is reportedly associated with SBA-like motor dysfunctions [21]. In this study, caspase-3  
302 immunoreactivity, a marker of apoptosis, in GABAergic neurons in the dorsal horns of SBA  
303 chicks was evident at an advanced gestational stage (ED-18). Caspase-3 immunoreactivity  
304 gradually increased at the early neonatal stage and was strong at PD-10, when SBA chicks  
305 exhibited only a few damaged interneuron-like structures in the dorsal horn area (Fig. 7).  
306 Collectively, these findings demonstrate that reduced inhibitory transmission and increased  
307 apoptotic activity in the exposed spinal cord are involved in the pathogenesis of neurological  
308 complications, such as motor deficits and pain, in SBA chicks.

309 In conclusion, our findings provide evidence that early neonatal loss of inhibitory  
310 transmission disrupts the neuronal networks in the spinal cord dorsal horn, and that this  
311 contributes to SBA-related pain-like complications. Moreover, our results shed light on the  
312 mechanisms underlying cellular abnormalization and degeneration. They also suggest that the  
313 effects of neurological disorders in SBA patients can be modulated by manipulating the  
314 GABAergic system, which may be a promising avenue for novel therapeutic interventions.

315 **Acknowledgements**

316 We would like to thank D. Shimizu for his technical support with confocal imaging.

317

318 **Funding**

319 This work was supported in part by grants to M.S.I.K. from the Japan Society for the  
320 Promotion of Science (No. 15K20005 and 18K07500) and to S.M (No. 18K08945).

321

322 **Author contributions**

323 M.S.I.K. and S.M. planned, designed and performed experiments, analyzed results and  
324 compiled the manuscript; M.S.I.K. generated surgery-induced SBA chicks; H.N., F.I., T.S. S.S.  
325 and T.T. involved in data interpretation and manuscript editing; All authors discussed the study  
326 and approved the final manuscript.

327

328 **Additional Information**

329 The authors declare no competing financial interests.

330

331 The English in this document has been checked by at least two professional editors, both native  
332 speakers of English. For a certificate, please see:

333

334 <http://www.textcheck.com/certificate/xzJOfn>

335

336 **References**

- 337 1. Copp AJ, Adzick NS, Chitty LS, Fletcher JM, Holmbeck GN, Shaw GM. Spina bifida. *Nat Rev*  
338 *Dis Primers*. 2015; 1:15007. doi: 10.1038/nrdp.2015.7.
- 339 2. Osaka K, Tanimura T, Hirayama A, Matsumoto S. Myelomeningocele before birth. *J*  
340 *Neurosurg*. 1978; 49: 711–724.
- 341 3. Copp AJ, Brook FA, Estibeiro JP, Shum AS, Cockroft DL. The embryonic development of  
342 mammalian neural tube defects. *Prog Neurobiol*. 1990; 35: 363–403.
- 343 4. Heffez DS, Aryanpur J, Hutchins GM, Freeman JM. The paralysis associated with  
344 myelomeningocele: clinical and experimental data implicating a preventable spinal cord  
345 injury. *Neurosurgery*. 1990; 26: 987–992.
- 346 5. Millicovsky G, Lazar ML. Spina bifida: role of neural tissue damage during pregnancy in  
347 producing spinal paralysis. *Obstet Gynecol*. 1995; 86: 300–301.
- 348 6. Sival DA, van Weerden TW, Vles JS, Timmer A, den Dunnen WF, Staal-Schreinemachers AL,  
349 et al. Neonatal loss of motor function in human spina bifida aperta. *Pediatrics*. 2004; 114:  
350 427–434.
- 351 7. Meuli M, Meuli-Simmen C, Hutchins GM, Yingling CD, Hoffman KM, Harrison MR, et al. In  
352 utero surgery rescues neurological function at birth in sheep with spina bifida. *Nat Med*.  
353 1995; 1: 342–347.
- 354 8. Werhagen L, Hultling C, Borg K. Pain, especially neuropathic pain, in adults with spina bifida,  
355 and its relation to age, neurological level, completeness, gender and hydrocephalus. *Rehabil*  
356 *Med*. 2010; 42:374–376.
- 357 9. Werhagen L, Gabrielsson H, Westgren N, Borg K. Medical complication in adults with spina  
358 bifida. *Clin Neurol Neurosurg*. 2013; 115:1226–1229.
- 359 10. Clancy CA, McGrath PJ, Oddson BE. Pain in children and adolescents with spina bifida. *Dev*  
360 *Med Child Neurol*. 2005; 47:27–34.

- 361 11. Alriksson-Schmidt AI, Thibadeau JK, Swanson ME, Marcus D, Carris KL, Siffel C, Ward E.  
362 The natural history of spina bifida in children pilot project: research protocol. *JMIR Res*  
363 *Protoc.* 2013; 2(1):e2.
- 364 12. Szymanski KM, Cain MP, Whittam B, Kaefer M, Rink RC, Misseri R. Incontinence affects  
365 health-related quality of life in children and adolescents with spina bifida. *J Pediatr Urol.*  
366 2018; 14: 279.e1–279.e8.
- 367 13. Hiura, A., Nasu, F., Ishizuka, H., Kuwahara, M., Ohta, M. Evidence of synaptic contacts of  
368 nociceptive primary afferent central terminals on GABAergic interneurons in the substantia  
369 gelatinosa. *Arch Histol Cytol.* 1996; 59: 55–60.
- 370 14. Morgan MM, Whitney PK. Behavioral analysis of diffuse noxious inhibitory controls (DNIC):  
371 antinociception and escape reactions. *Pain.* 1996; 66: 307–312.
- 372 15. Ibuki T, Hama AT, Wang XT, Pappas GD, Sagen J. Loss of GABA-immunoreactivity in the  
373 spinal dorsal horn of rats with peripheral nerve injury and promotion of recovery by adrenal  
374 medullary grafts. *Neuroscience.* 1997; 76: 845–858.
- 375 16. Zhang AL, Hao JX, Seiger A, Xu XJ, Wiesenfeld-Hallin Z, Grant G, Aldskogius H. Decreased  
376 GABA immunoreactivity in spinal cord dorsal horn neurons after transient spinal cord  
377 ischemia in the rat. *Brain Res.* 1994; 656:187–190.
- 378 17. Liu J, Wolfe D, Hao S, Huang S, Glorioso JC, Mata M, Fink DJ. Peripherally delivered  
379 glutamic acid decarboxylase gene therapy for spinal cord injury pain. *Mol Ther.* 2004;10:  
380 57–66.
- 381 18. Gwak YS, Tan HY, Nam TS, Paik KS, Hulsebosch CE, Leem JW. Activation of spinal GABA  
382 receptors attenuates chronic central neuropathic pain after spinal cord injury. *J Neurotrauma.*  
383 2006; 23:1111–1124.
- 384 19. Mominoki K, Kinutani M, Wakisaka H, Saito S, Kobayashi N, Fujiwara T, et al. Leg  
385 dysfunctions in a hatched chick model of spina bifida aperta. *Exp Neurol.* 2006; 197: 133–



- 386 142.
- 387 20. Tsujimura R, Mominoki K, Kinutani M, Shimokawa T, Doihara T, Nabeka H, et al. Sensory  
388 tract abnormality in the chick model of spina bifida. *Neurosci Res.* 2011; 71: 85–91.
- 389 21. Khan MSI, Nabeka H, Islam F, Shimokawa T, Saito S, Li X, Kawabe S, Hamada F, Tachibana  
390 T, Matsuda S. Early neonatal loss of inhibitory synaptic input to the spinal motor neurons  
391 confers spina bifida-like leg dysfunction in a chicken model. *Dis Model Mech.* 2017;  
392 10:1421–1432.
- 393 22. Hamburger V, Hamilton HL. A series of normal stages in the development of the chick embryo.  
394 *J Morphol.* 1951; 88: 49–92.
- 395 23. Kinutani M, Coltey M, Le Douarin NM. Postnatal development of a demyelinating disease in  
396 avian spinal cord chimeras. *Cell.* 1986; 45: 307–314.
- 397 24. Kinutani M, Le Douarin NM. Avian spinal cord chimeras: I. Hatching ability and posthatching  
398 survival in homo- and heterospecific chimeras. *Dev Biol.* 1985; 111: 243–255.
- 399 25. Prunier A, Mounier L, Le Neindre P, Leterrier C, Mormède P, Paulmier V, Prunet P, Terlouw  
400 C, Guatteo R. Identifying and monitoring pain in farm animals: a review. *Animal.* 2013; 7:  
401 998–1010.
- 402 26. Malik A, Valentine A. Pain in birds: a review for veterinary nurses. *Vet Nurs J.* 2018; 33: 11–  
403 24.
- 404 27. Malcangio M, Bowery NG. GABA and its receptors in the spinal cord. *Trends Pharmacol Sci.*  
405 1996; 17: 457–462.
- 406 28. Antal M, Freund TF, Polgar E. Calcium-binding proteins, parvalbumin- and calbindin-D 28k-  
407 immunoreactive neurons in the rat spinal cord and dorsal root ganglia: a light and electron  
408 microscopic study. *J Comp Neurol.* 1990; 295:467–484.
- 409 29. Arvidsson U., Ulfhake B., Cullheim S., Ramírez V., Shupliakov O., Hökfelt T. Distribution  
410 of calbindin D28k-like immunoreactivity (LI) in the monkey ventral horn: do Renshaw cells

- 411 contain calbindin D28k-LI? *J Neurosci.* 1992; 12:718–728.
- 412 30. Castro-Lopes JM, Tavares I, Coimbra A GABA decreases in the spinal cord dorsal horn  
413 after peripheral neurectomy. *Brain Res.* 1993; 620:287–291.
- 414 31. Moore KA, Kohno T, Karchewski LA, Scholz J, Baba H, Woolf CJ. Partial peripheral nerve  
415 injury promotes a selective loss of GABAergic inhibition in the superficial dorsal horn of  
416 the spinal cord. *J Neurosci.* 2002; 22: 6724–6731.
- 417 32. Lever IJ, Pezet S, McMahon SB, Malcangio M. The signaling components of sensory fiber  
418 transmission involved in the activation of ERK MAP kinase in the mouse dorsal horn. *Mol*  
419 *Cell Neurosci.* 2003; 24: 259–270.
- 420 33. Coull JA, Boudreau D, Bachand K, Prescott SA, Nault F, S k A, De Koninck P, De Koninck  
421 Y. Trans-synaptic shift in anion gradient in spinal lamina I neurons as a mechanism of  
422 neuropathic pain. *Nature.* 2003; 424:938–42.
- 423 34. Millan MJ. Descending control of pain. *Prog Neurobiol.* 2002; 66: 355–474.
- 424 35. Bergenheim AT, Wendelius M, Shahidi S, Larsson E. Spasticity in a child with  
425 myelomeningocele treated with continuous intrathecal baclofen. *Pediatr Neurosurg.* 2003;  
426 39: 218–221.
- 427 36. Tatton WG, Chalmers-Redman RM, Ju WY, Wadia J, Tatton NA. Apoptosis in  
428 neurodegenerative disorders: potential for therapy by modifying gene transcription. *J Neural*  
429 *Transm Suppl.* 1997; 49: 245–268.
- 430 37. Lawson SJ, Lowrie MB. The role of apoptosis and excitotoxicity in the death of spinal  
431 motoneurons and interneurons after neonatal nerve injury. *Neuroscience.* 1998; 87: 337–  
432 348.
- 433 38. Keane RW, Kraydieh S, Lotocki G, Alonso OF, Aldana P, Dietrich WD. Apoptotic and  
434 antiapoptotic mechanisms after traumatic brain injury. *J Cereb Blood Flow Metab.* 2001;  
435 21: 1189–1198.

- 436 39. Adzick NS. Fetal surgery for myelomeningocele: trials and tribulations. Isabella Forshall  
437 Lecture. *J Pediatr Surg*. 2012; 47: 273–281.
- 438 40. Kowitzke B, Cohrs G, Leuschner I, Koch A, Synowitz M, Mehdorn HM, et al. Cellular  
439 profiles and molecular mediators of lesion cascades in the placode in human open spinal  
440 neural tube defects. *J Neuropathol Exp Neurol*. 2016; 75: 827–842.

441 **Table 1. Assessment of sensorimotor reactions in spina bifida aperta (SBA) chicks.**

| Age   | Sensorimotor reactions by toe-pinching (total score: 5 per parameter) |              |      |                |              |      |
|-------|-----------------------------------------------------------------------|--------------|------|----------------|--------------|------|
|       | Control                                                               |              |      | SBA            |              |      |
|       | Leg withdrawal                                                        | Vocalization | Jump | Leg withdrawal | Vocalization | Jump |
| PD-0  | 4                                                                     | 4            | 5    | 5              | 4            | 5    |
| PD-2  | 5                                                                     | 5            | 5    | 3              | 5            | 2    |
| PD-4  | 5                                                                     | 5            | 5    | 2              | 5*           | 1    |
| PD-10 | 4                                                                     | 3            | 4    | 1              | 5*           | 0    |

442 A 5-point scoring system was used to grade sensorimotor reactions (leg withdrawal reflex,  
443 jumping, and vocalizations) after toe-pinching in normal control and SBA chicks at the early  
444 neonatal stage. Sensorimotor reactions were graded as no reaction (0 points), minimal reaction  
445 (1–2 points), reduced reaction (3–4 points), and normal reaction (5 points). \* Difficult to  
446 distinguish toe-pinching-induced vocalization reaction, as the SBA chicks were experienced  
447 persistent vocalization.

448

449 **Figure Legends**

450 **Figure 1. Pain-like behavioral changes in spina bifida aperta (SBA) chicks.** (a) Representative  
451 photographs of the phenotypes of normal and SBA chicks. The control chicks were able to move  
452 freely (i) whereas SBA chicks moved with severe difficulty (ii). (b) Numbers of vocalizations in  
453 normal and SBA neonatal chicks. (c) The intensity (loudness) and frequency (pitch) of  
454 vocalizations in normal and SBA neonatal chicks. The data in Fig. 1b are means  $\pm$  SEM; n = 6  
455 per group at each age. \*Significantly different from the SBA group ( $P < 0.001$ ), two-way ANOVA  
456 and *post hoc* Tukey's test.

457

458 **Figure 2. Postnatal loss of  $\gamma$ -aminobutyric acid (GABA) immunoreactivity in the spinal cord**  
459 **dorsal horns of SBA chicks.** (a–h) Immunohistochemical analysis of the expression and  
460 localization of GABA in the spinal cord open defect area in SBA chicks, and at a similar location  
461 in normal chicks, at ED-14 and PD-4. Representative images of the paraffin-embedded spinal  
462 cords of control (a–d) and SBA (e–h) chicks. (i) GABA immunoreactivity in the dorsal horn  
463 laminae I–III of control and SBA chicks measured using ImageJ software. The optical density  
464 (OD) was calculated using the following formula:  $OD = (\log_{10} [\text{incident light}/\text{transmitted light}])$ .  
465 Six random sections per chick at each age and for each group were analyzed. (j) Number of  
466 GABA-immunopositive cells in the spinal cord dorsal horn laminae I–III of control and SBA  
467 chicks. The data in Figs. 2i and 2j are means  $\pm$  SEM; n = 6 in each group at each age.  
468 \*Significantly different from the SBA group at each age ( $P < 0.01$ ), two-way ANOVA and *post*  
469 *hoc* Tukey's test. Arrows indicate GABA-immunopositive cells.

470

471 **Figure 3. Postnatal loss of parvalbumin (PV) immunoreactivity in the spinal cord dorsal**  
472 **horns of SBA chicks.** (a–h) Immunohistochemical analyses of the expression and localization of  
473 PV in the spinal cord open defect area in SBA chicks, and at a similar location in normal chicks,

474 at ED-14 and PD-4. Representative images of the paraffin-embedded spinal cords of control (a–  
475 d) and SBA (e–h) chicks. (i) PV immunoreactivity in the dorsal horn laminae I–III of control and  
476 SBA chicks measured using ImageJ software. The optical density (OD) was calculated using the  
477 following formula:  $OD = (\log_{10} [\text{incident light}/\text{transmitted light}])$ . Six random sections per chick  
478 at each age and in each group were analyzed. (j) Numbers of PV-immunopositive cells in the  
479 spinal cord dorsal horn laminae I–III of control and SBA chicks. The data in Figs. 2i and 2j are  
480 presented as means  $\pm$  SEM; n = 6 per group at each age. \*Significantly different from the SBA  
481 group at each age ( $P < 0.01$ ), two-way ANOVA and *post hoc* Tukey's test. Arrows indicate PV-  
482 immunopositive cells.

483

484 **Figure 4. Postnatal loss of calretinin (CR) immunoreactivity in the spinal cord dorsal horns**  
485 **of SBA chicks.** (a–h) Immunohistochemical analyses of the expression and localization of CR in  
486 the spinal cord open defect area in SBA chicks, and at a similar location in normal chicks, at ED-  
487 14 and PD-4. Representative images of the paraffin-embedded spinal cords of control (a–d) and  
488 SBA (e–h) chicks. (i) CR immunoreactivity in the dorsal horn laminae I–III of control and SBA  
489 chicks measured using ImageJ software. The optical density (OD) was calculated using the  
490 following formula:  $OD = (\log_{10} [\text{incident light}/\text{transmitted light}])$ . Six random sections per chick  
491 at each age and for each group were analyzed. (j) Numbers of CR-immunopositive cells in the  
492 spinal cord dorsal horn laminae I–III of control and SBA chicks. The data in Figs. 2i and 2j are  
493 means  $\pm$  SEM; n = 6 per group at each age. \*Significantly different from the SBA group at each  
494 age ( $P < 0.01$ ), two-way ANOVA and *post hoc* Tukey's test. Arrows indicate CR-immunopositive  
495 cells.

496

497 **Figure 5. Postnatal loss of calbindin-D-28K (CB) immunoreactivity in the spinal cord dorsal**  
498 **horns of SBA chicks.** (a–h) Immunohistochemical analyses of the expression and localization of

499 CB in the spinal cord open defect area in SBA chicks, and at a similar location in normal chicks,  
500 at ED14 and PD-4. Representative images of the paraffin-embedded spinal cords of control (a–d)  
501 and SBA (e–h) chicks. (i) CB immunoreactivity in the dorsal horn laminae I–III of control and  
502 SBA chicks measured using ImageJ software. The optical density (OD) was calculated using the  
503 following formula:  $OD = (\log_{10} [\text{incident light}/\text{transmitted light}])$ . Six random sections per chick  
504 at each age and for each group were analyzed. (j) Numbers of CB-immunopositive cells in the  
505 spinal cord dorsal horn laminae I–III of control and SBA chicks. The data in Figs. 2i and 2j are  
506 presented as means  $\pm$  SEM; n = 6 per group at each age. \*Significantly different from the SBA  
507 group at each age ( $P < 0.01$ ), two-way ANOVA and *post hoc* Tukey's test. Arrows indicate CB-  
508 immunopositive cells.

509

510 **Figure 6. Postnatal loss of GABAergic transmission in the spinal cord dorsal horns of SBA**  
511 **chicks.** (a) Double immunofluorescence staining for GABA and either CB or CR. Representative  
512 confocal images of the localization of GABA and CB (a–h) or GABA and CR (i–p) in normal and  
513 SBA chicks on ED-14, ED-18, PD-4, and PD-10. Images of the dorsal horn (laminae I–III) in the  
514 open defect of the lumbar cord in SBA chicks and in a similar location in normal chicks. GABA,  
515 red; CB or CR, green; co-localization, yellow; DAPI, blue. Arrows indicate GABAergic-  
516 immunopositive cells.

517

518 **Figure 7. Caspase 3-mediated apoptosis of GABAergic neurons in the spinal cord dorsal**  
519 **horns of SBA chicks.** (i–viii) Representative confocal images showing immunofluorescence  
520 staining for caspase-3, a marker of apoptosis, and CB-expressing neurons, in the dorsal horn open  
521 defect in the lumbar cord of SBA chicks (v–viii) and at a similar location in normal chicks (i–iv).  
522 Caspase-3, red; CB, green; co-localization, yellow; DAPI, blue. \*Interneuron-like damaged  
523 structures in SBA chicks at PD-10. Arrows indicate caspase-3 immunoreactivity in CB-

524 expressing neurons.

525

526 **Supplementary Video 1.** Representative video clips of the behaviors of normal and SBA chicks  
527 at the early neonatal stage.

528

529 **Supplementary Video 2.** Representative video clips of the sensorimotor reactions to toe-pinching  
530 in normal and SBA chicks at the early neonatal stage.



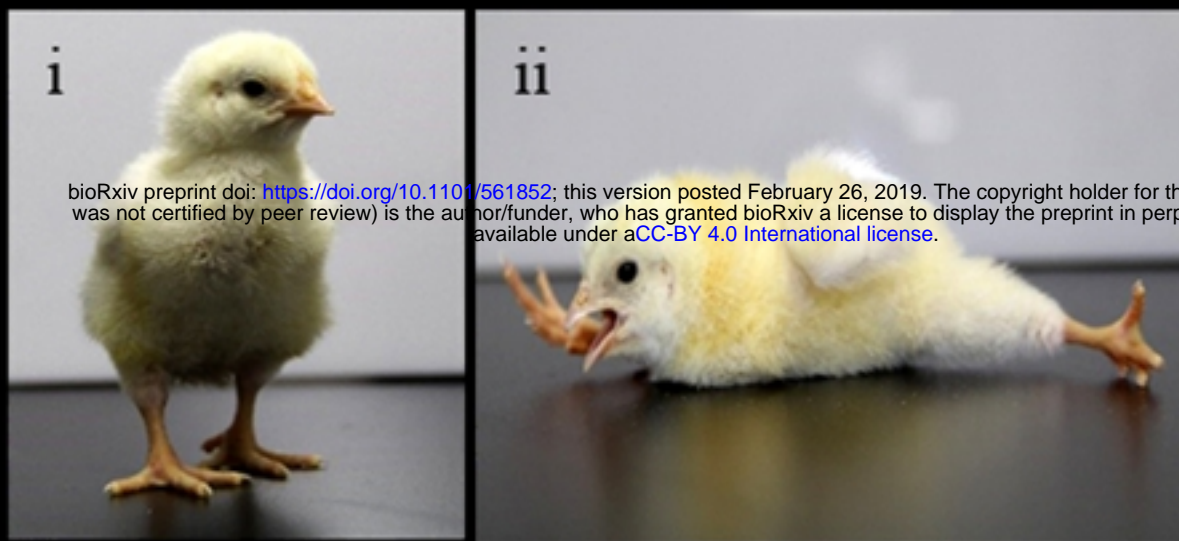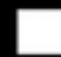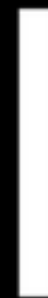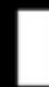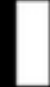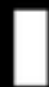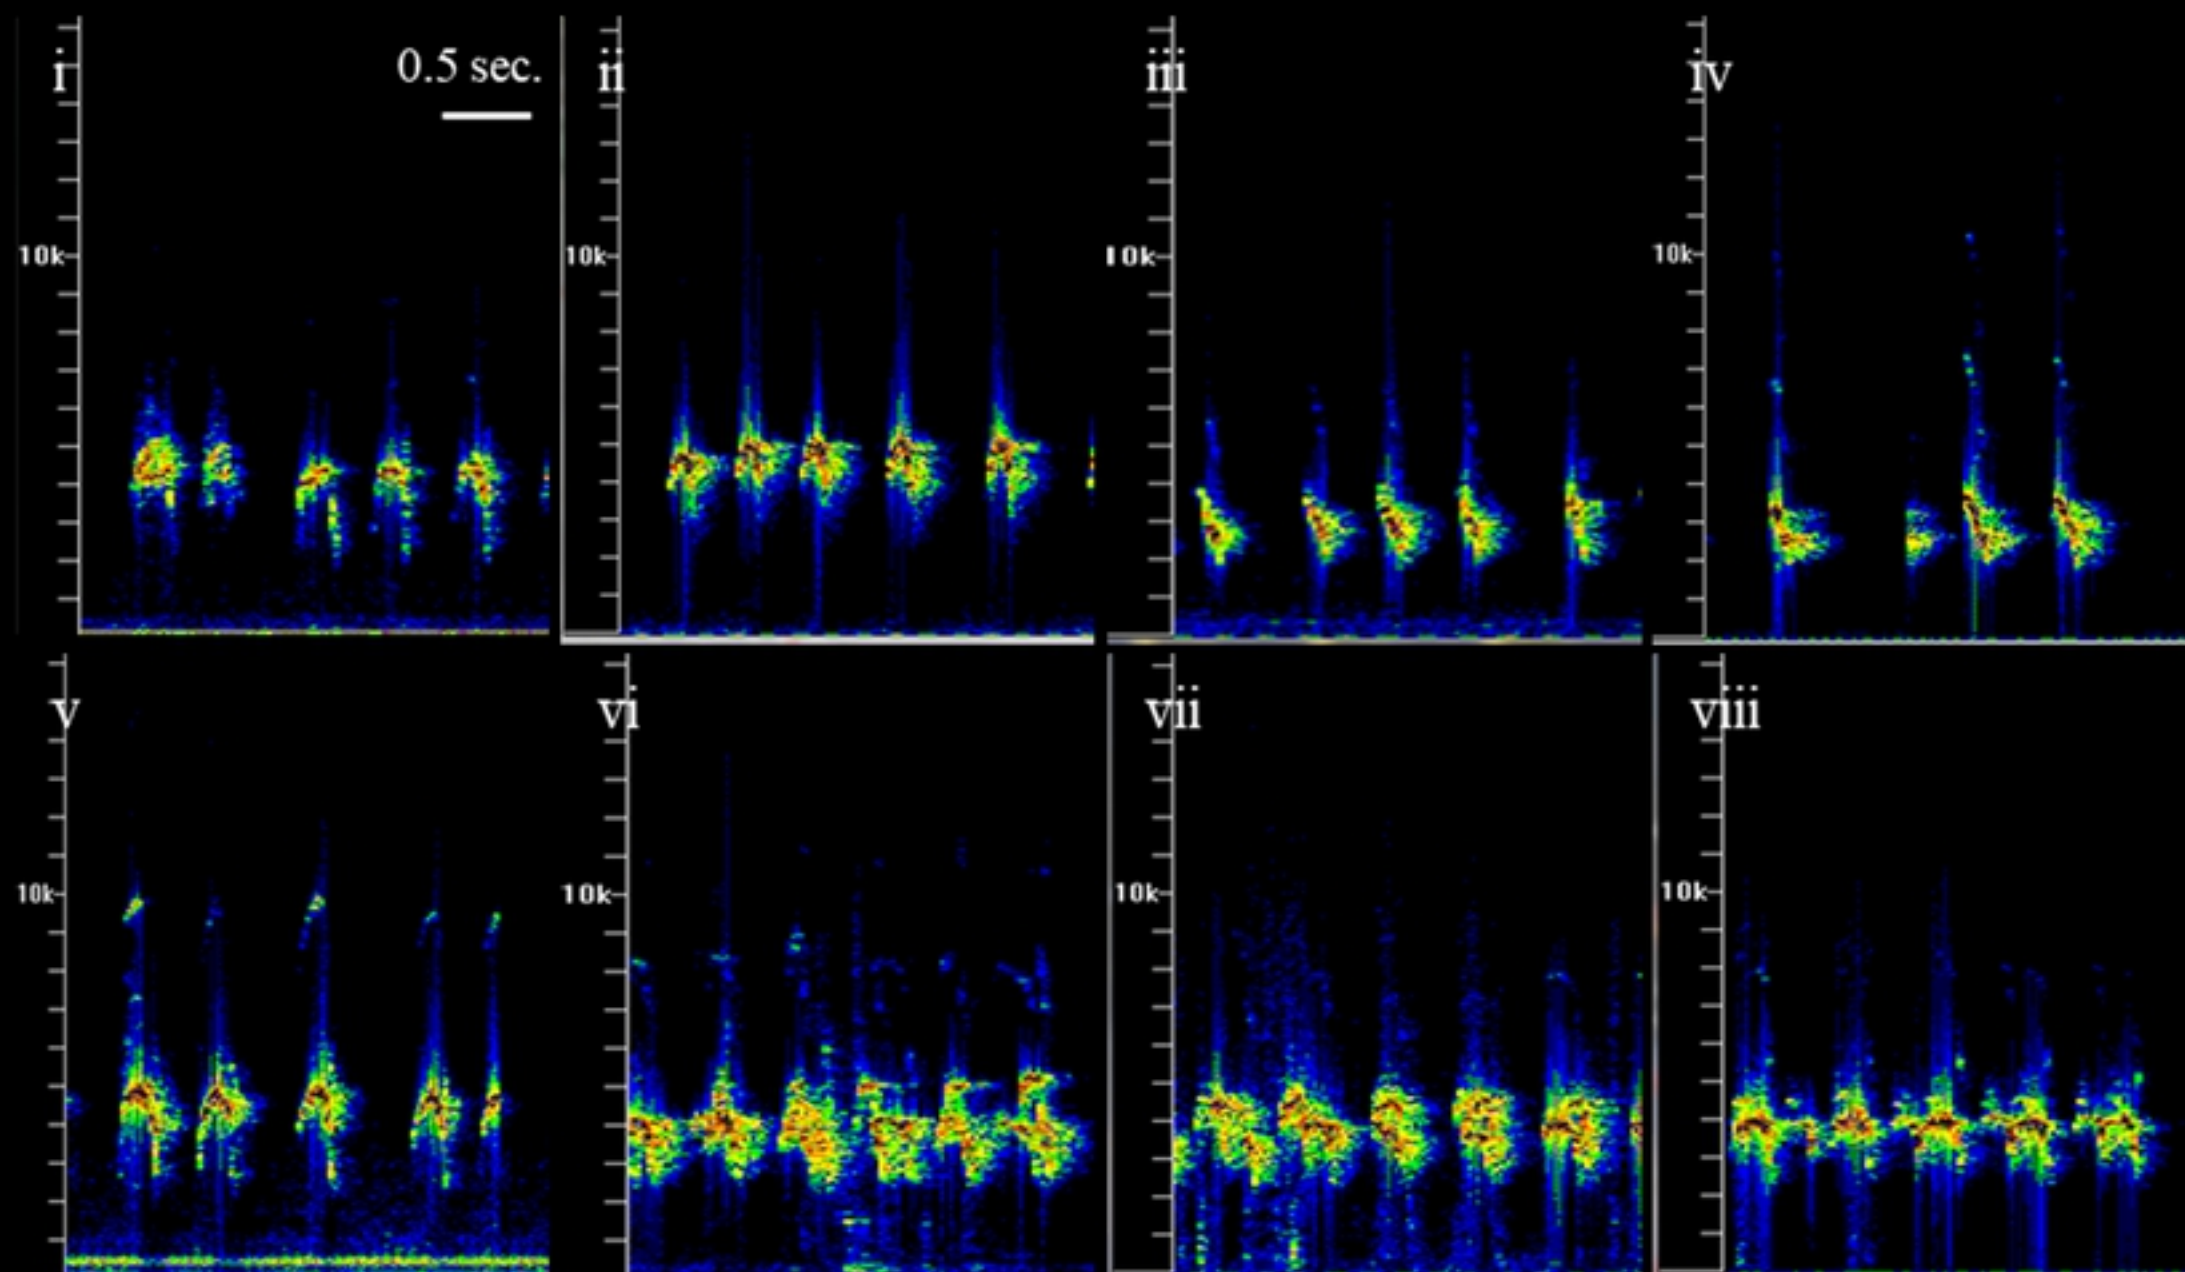

Figure 1



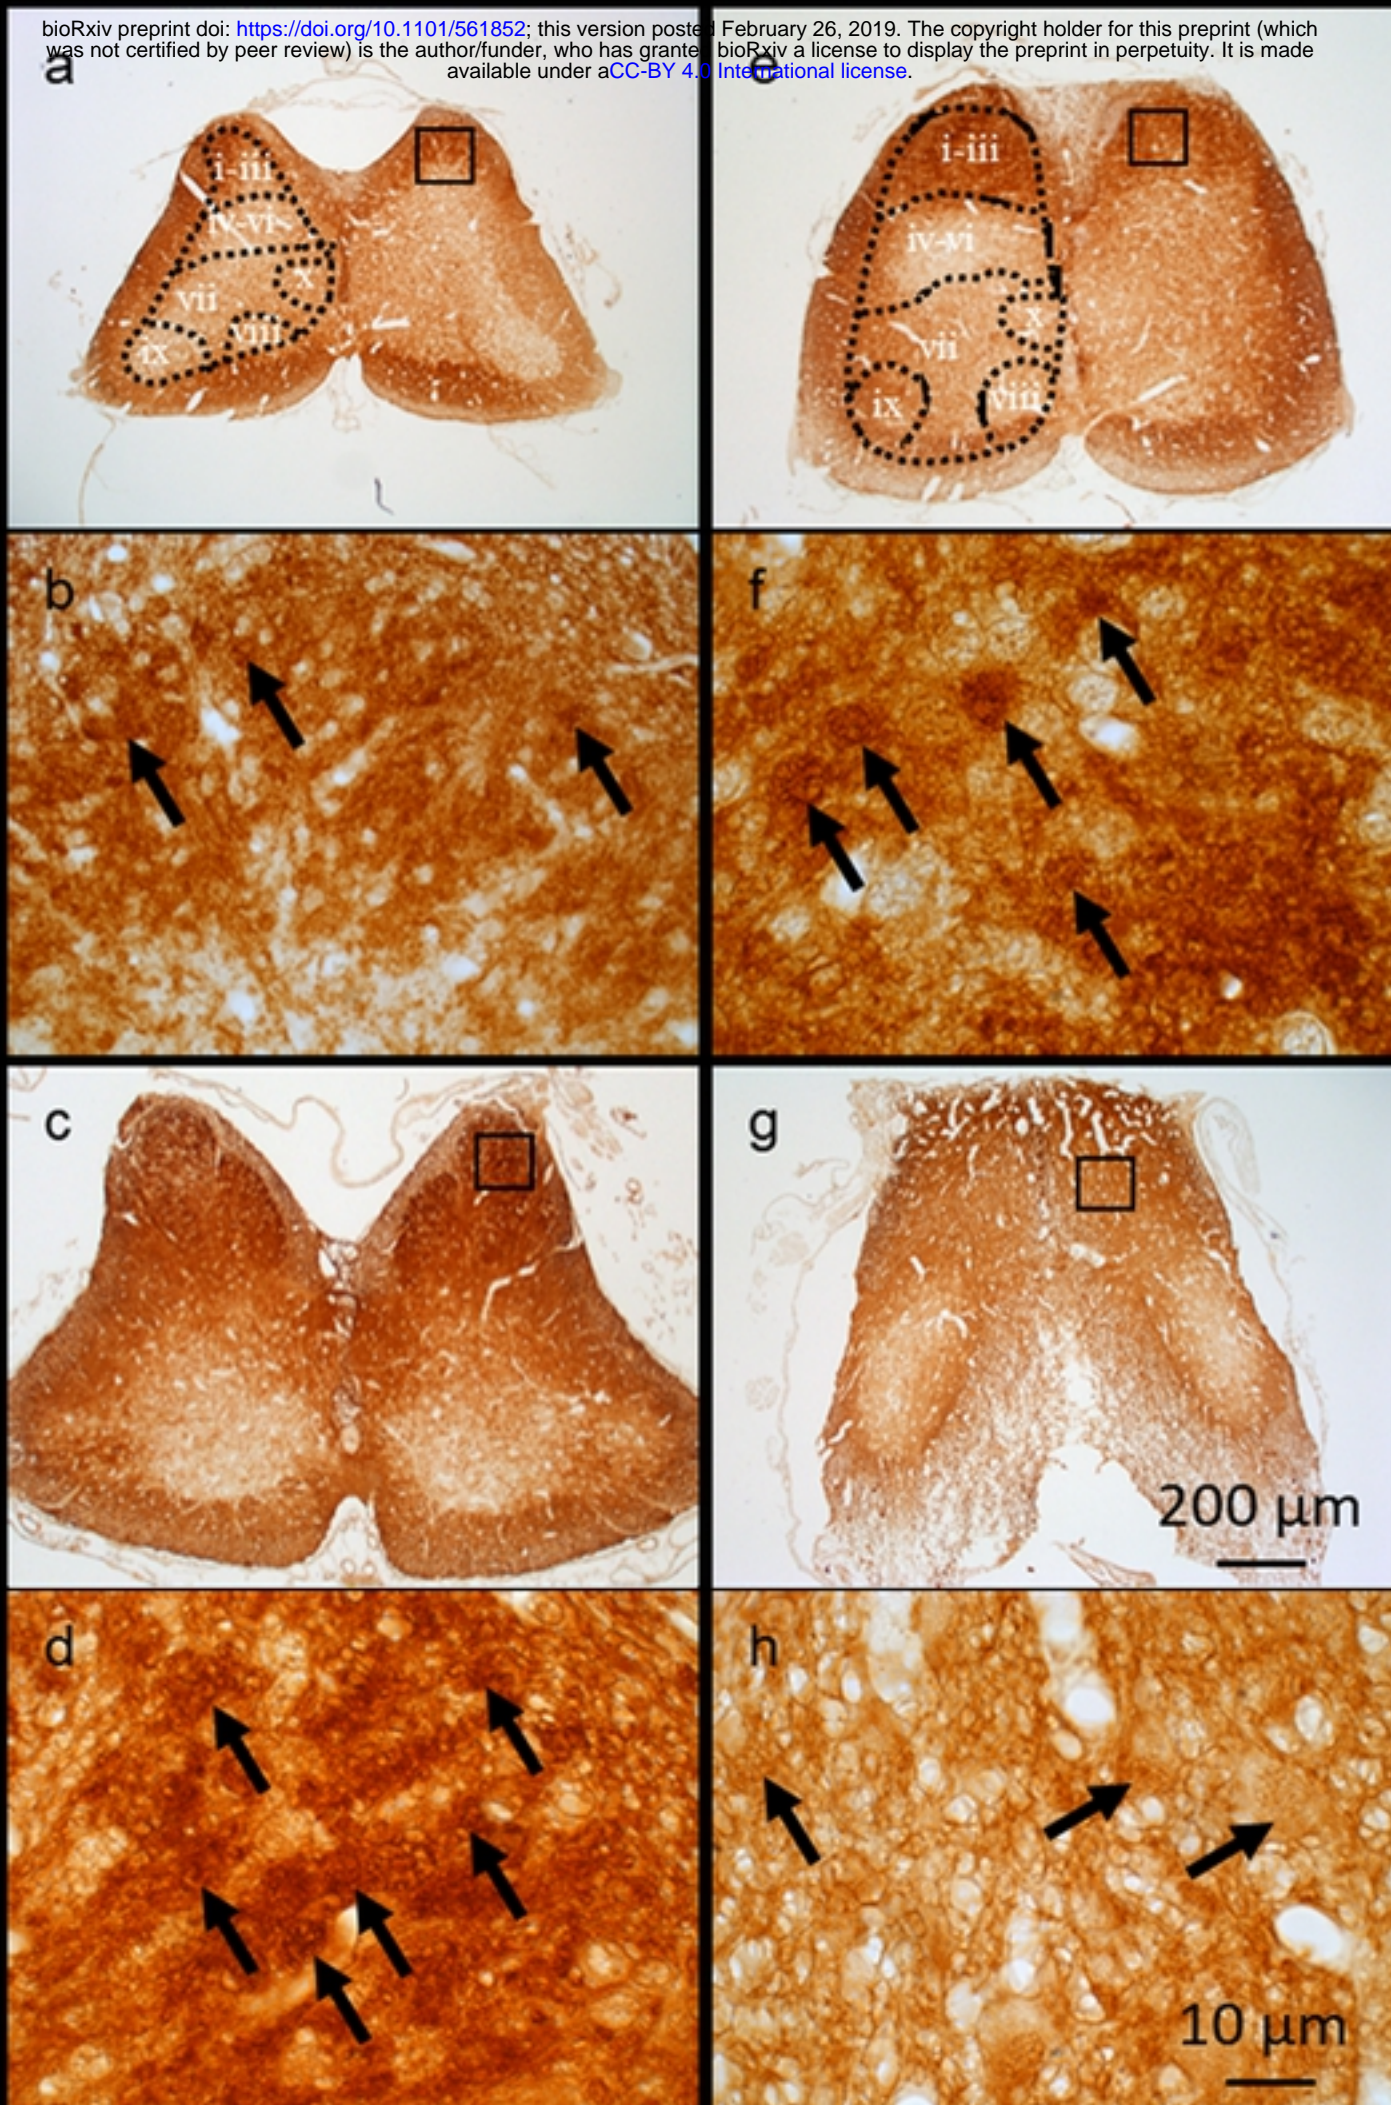

Figure 2



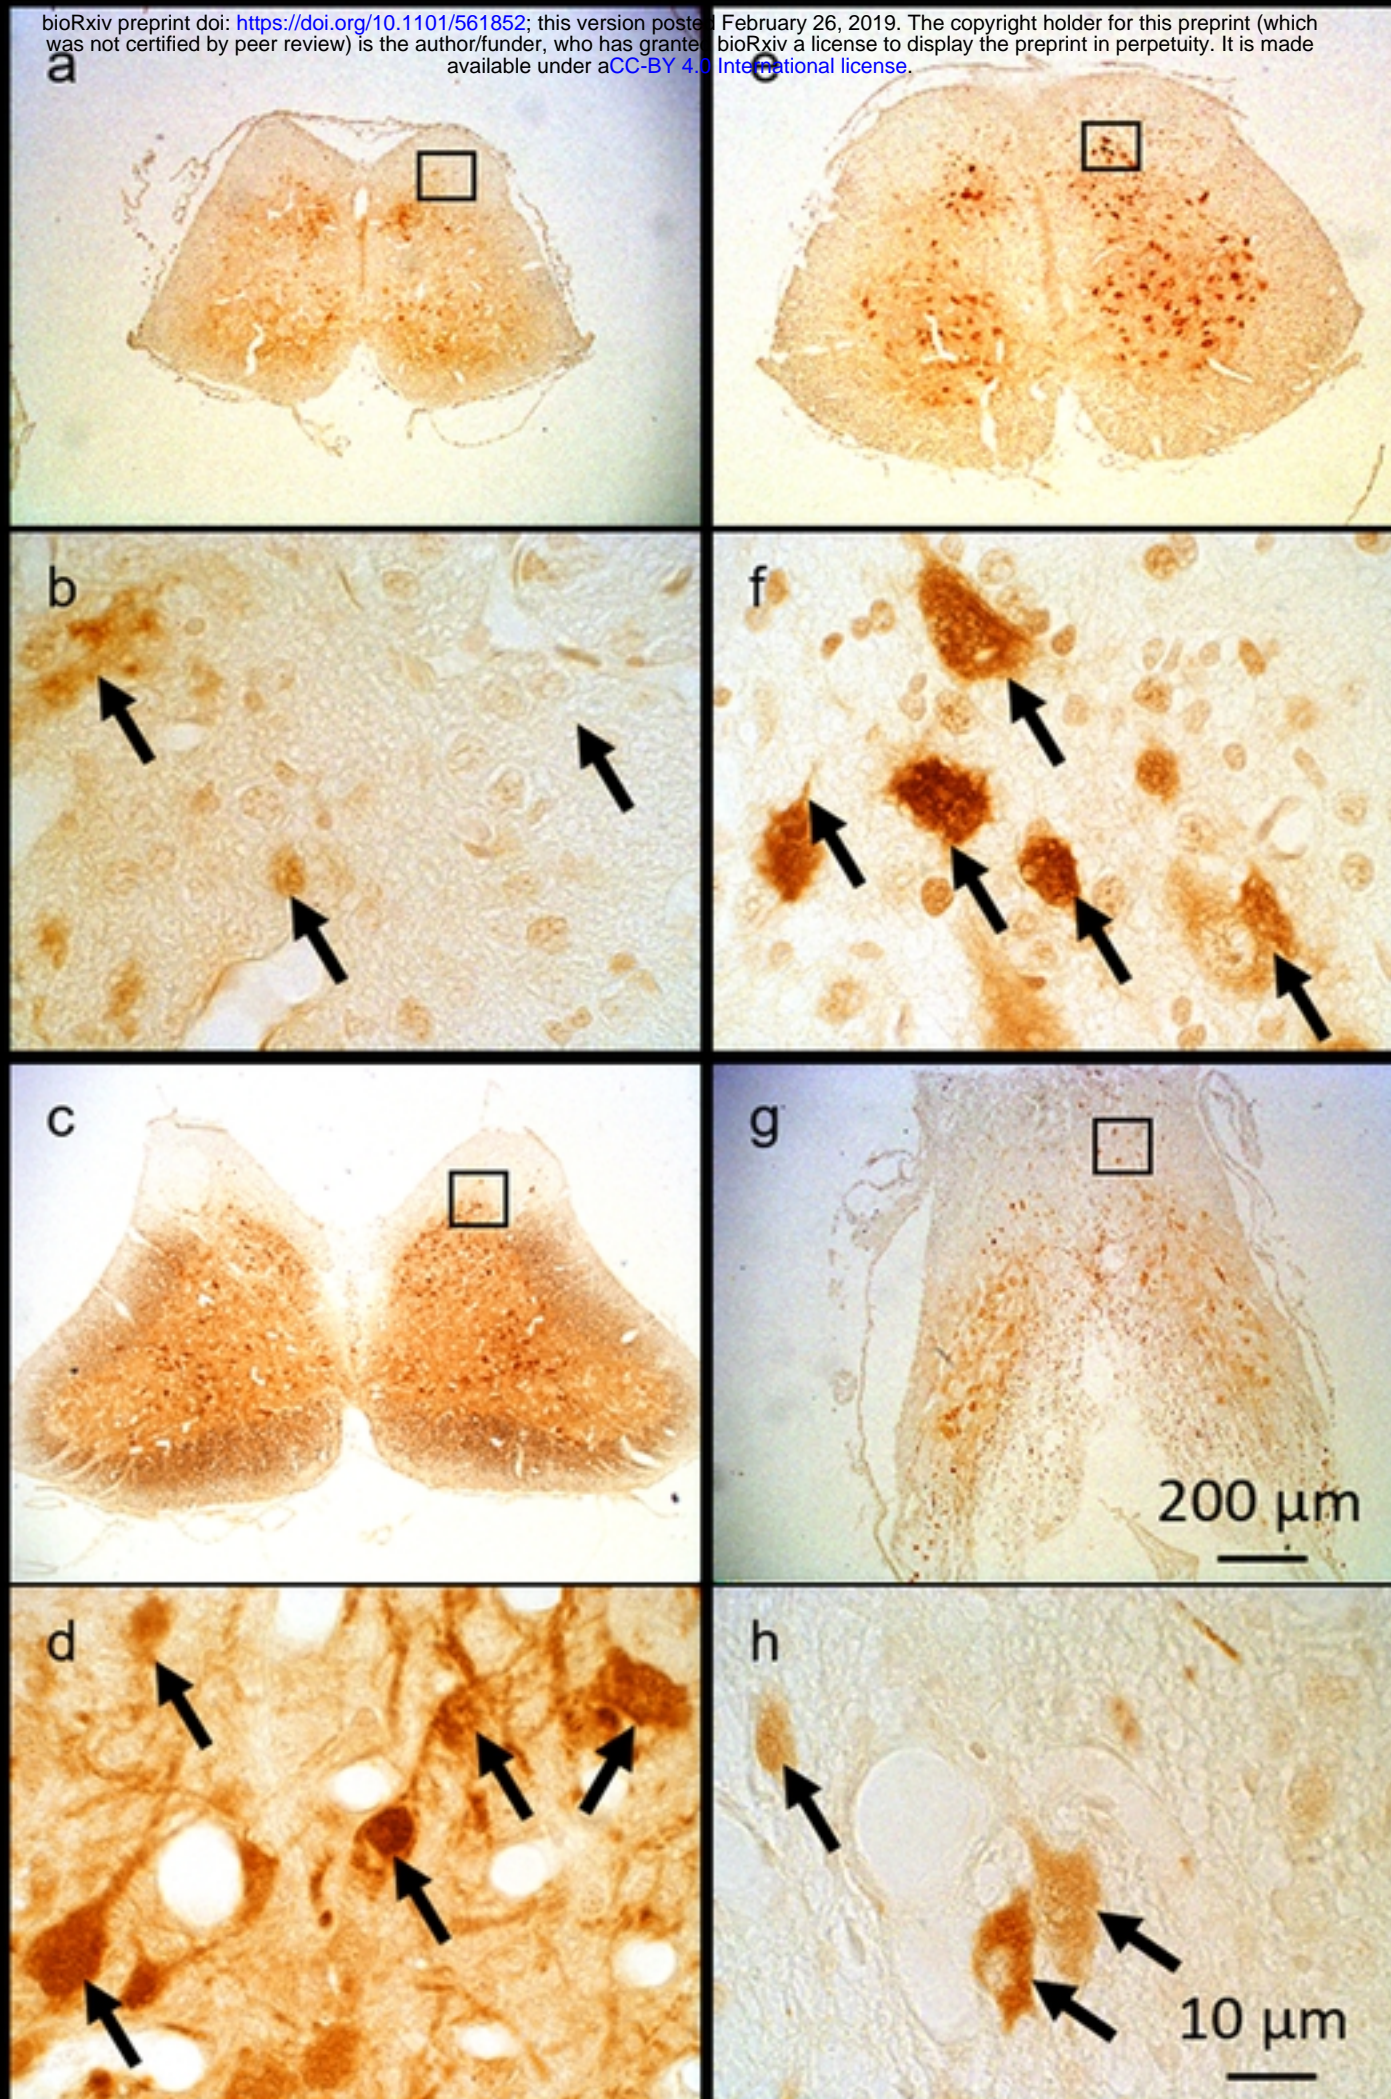

Figure 3



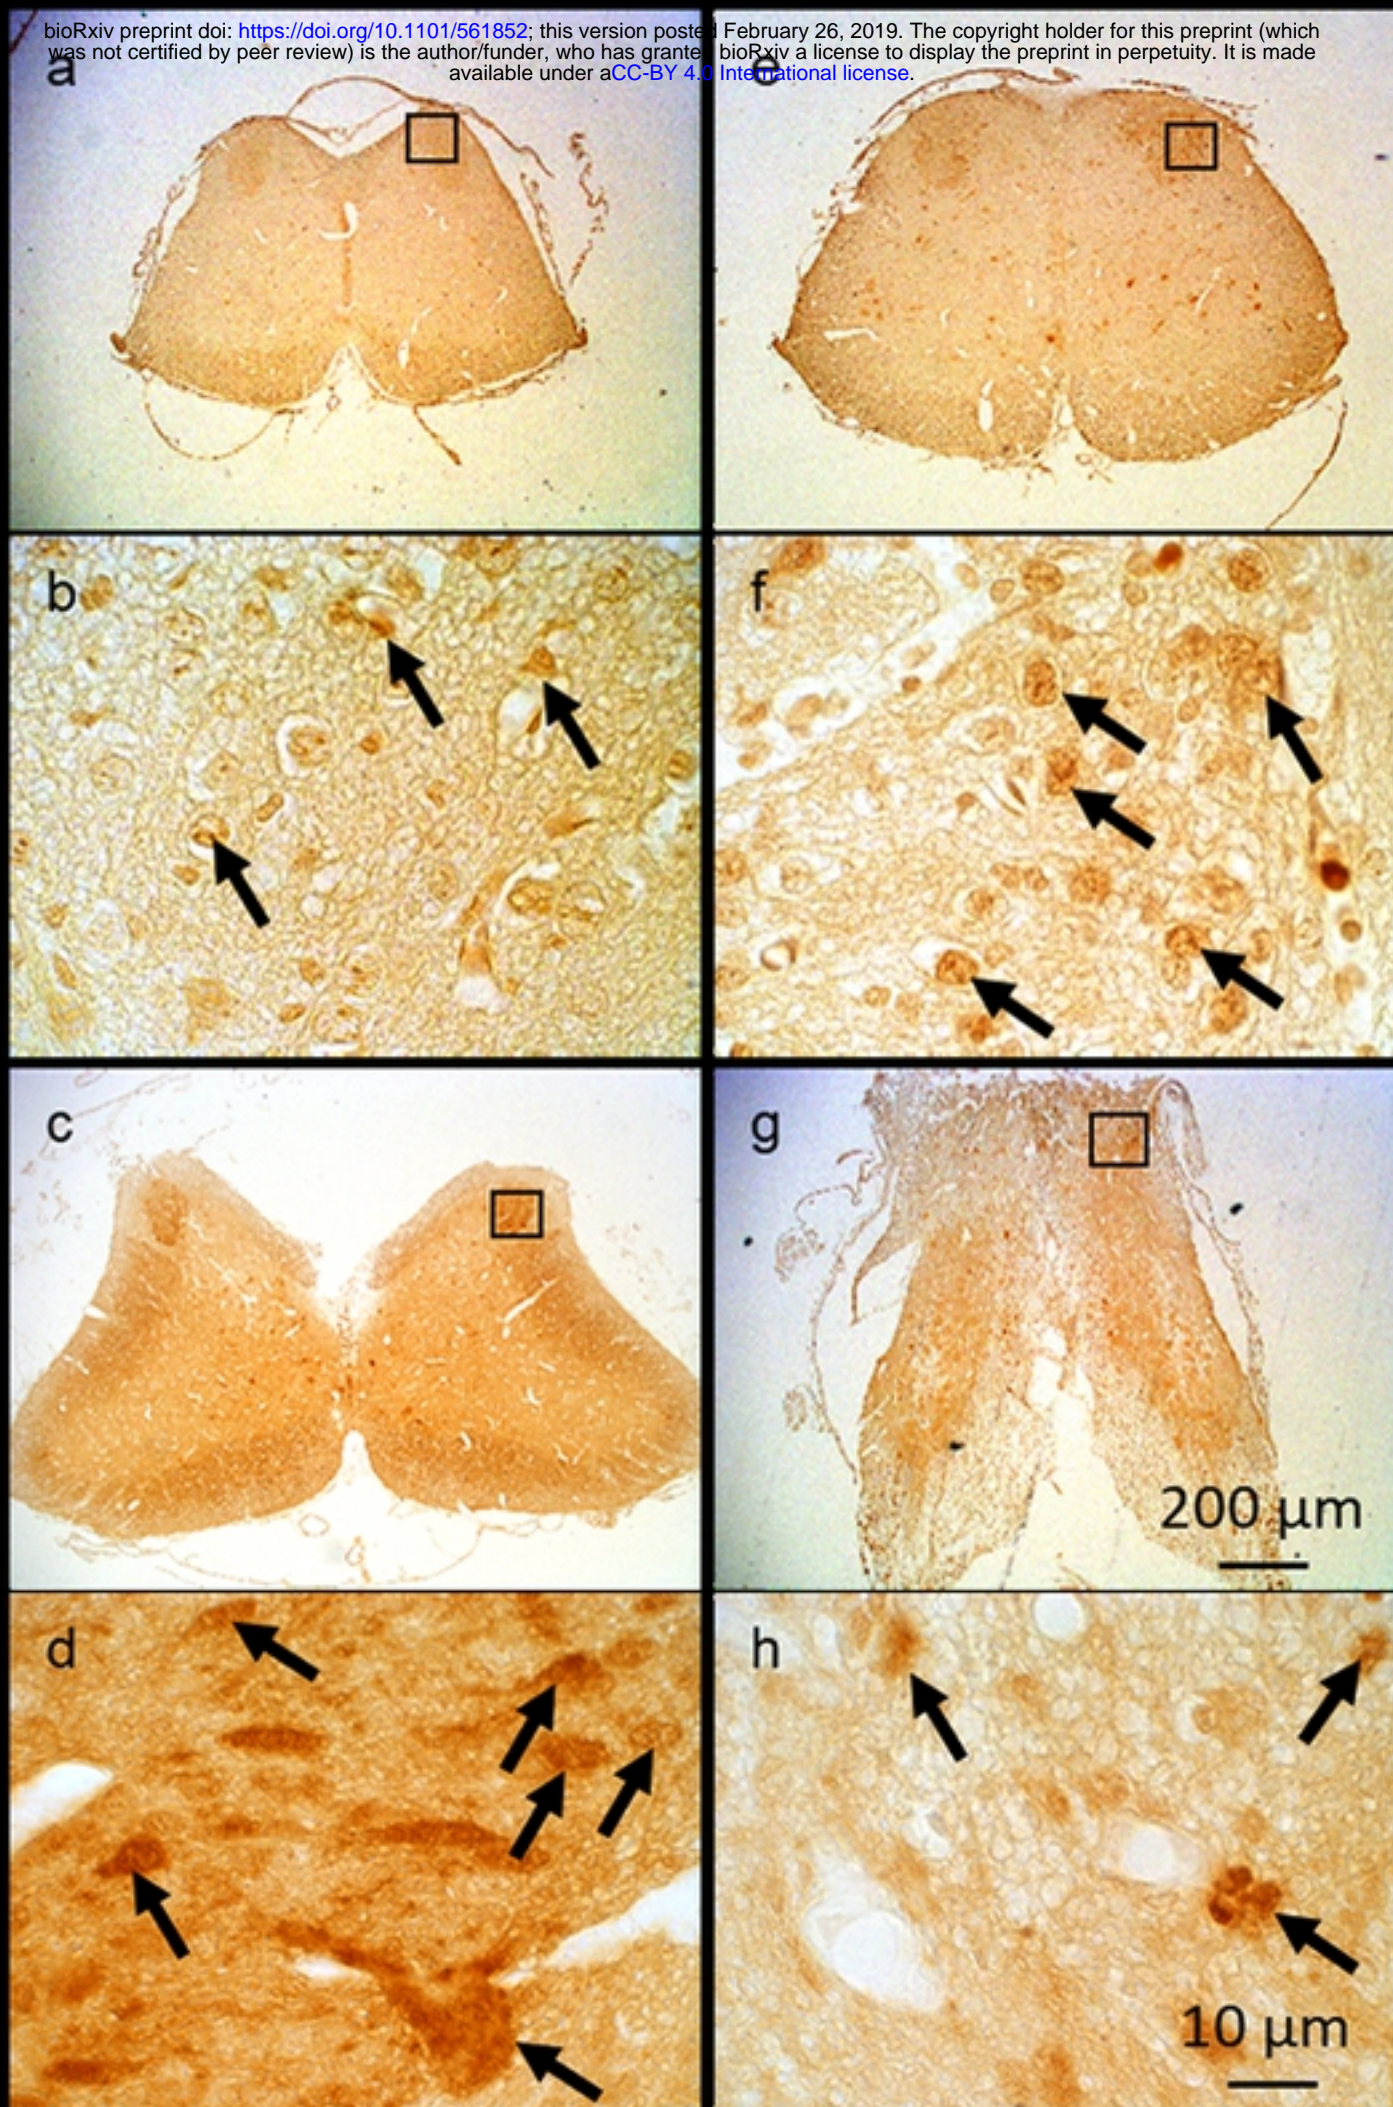

Figure 4



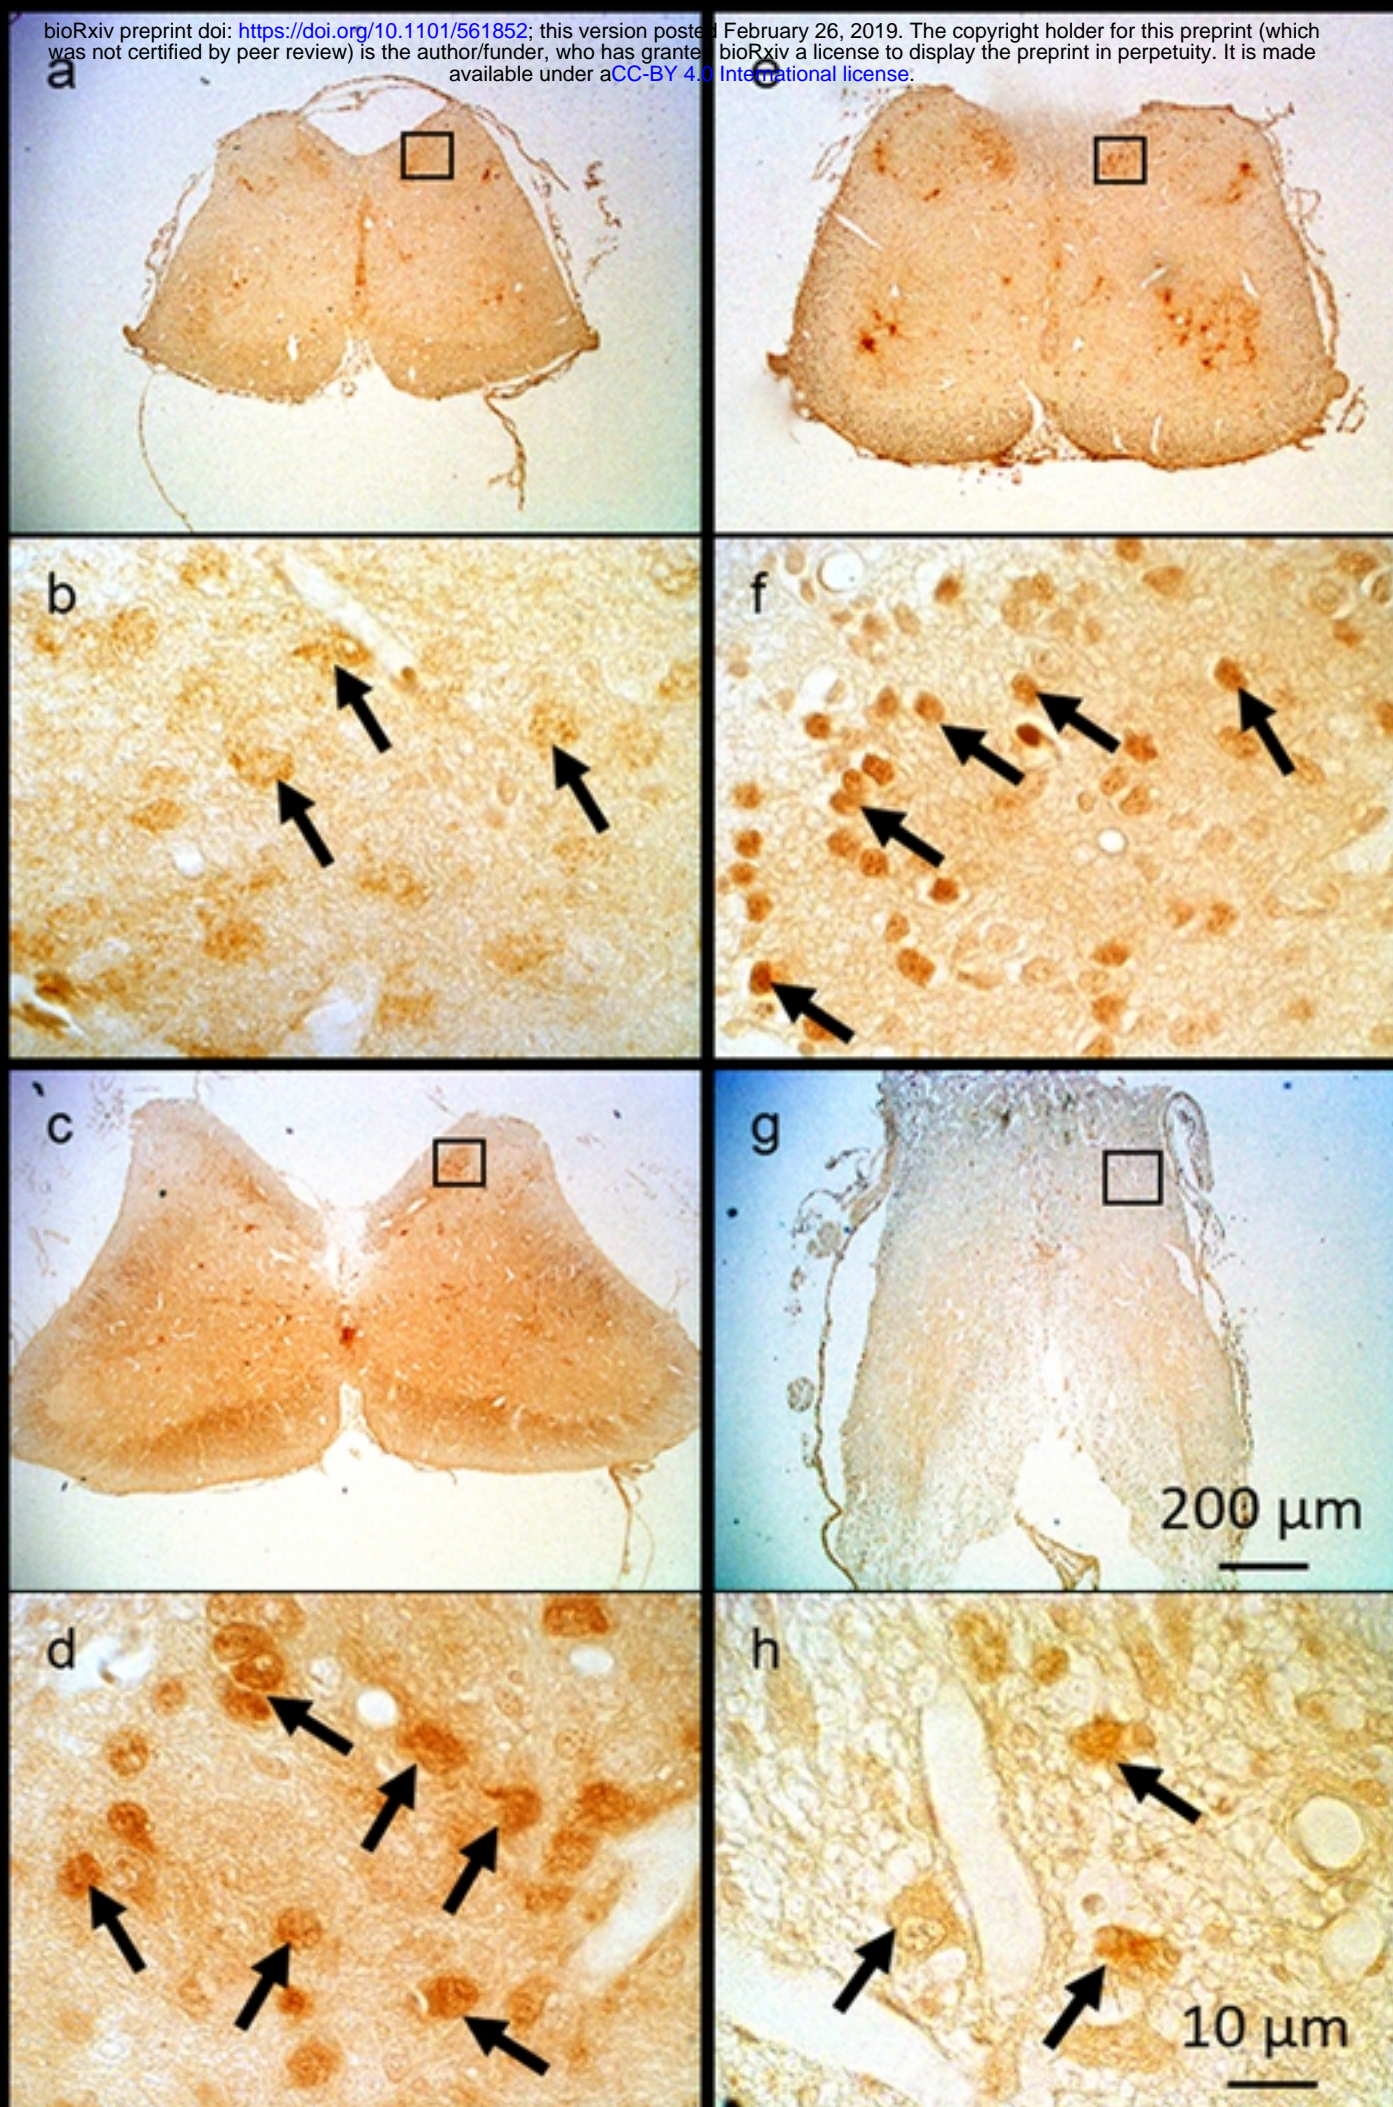

Figure 5



**GABA****CB****GABA****CR**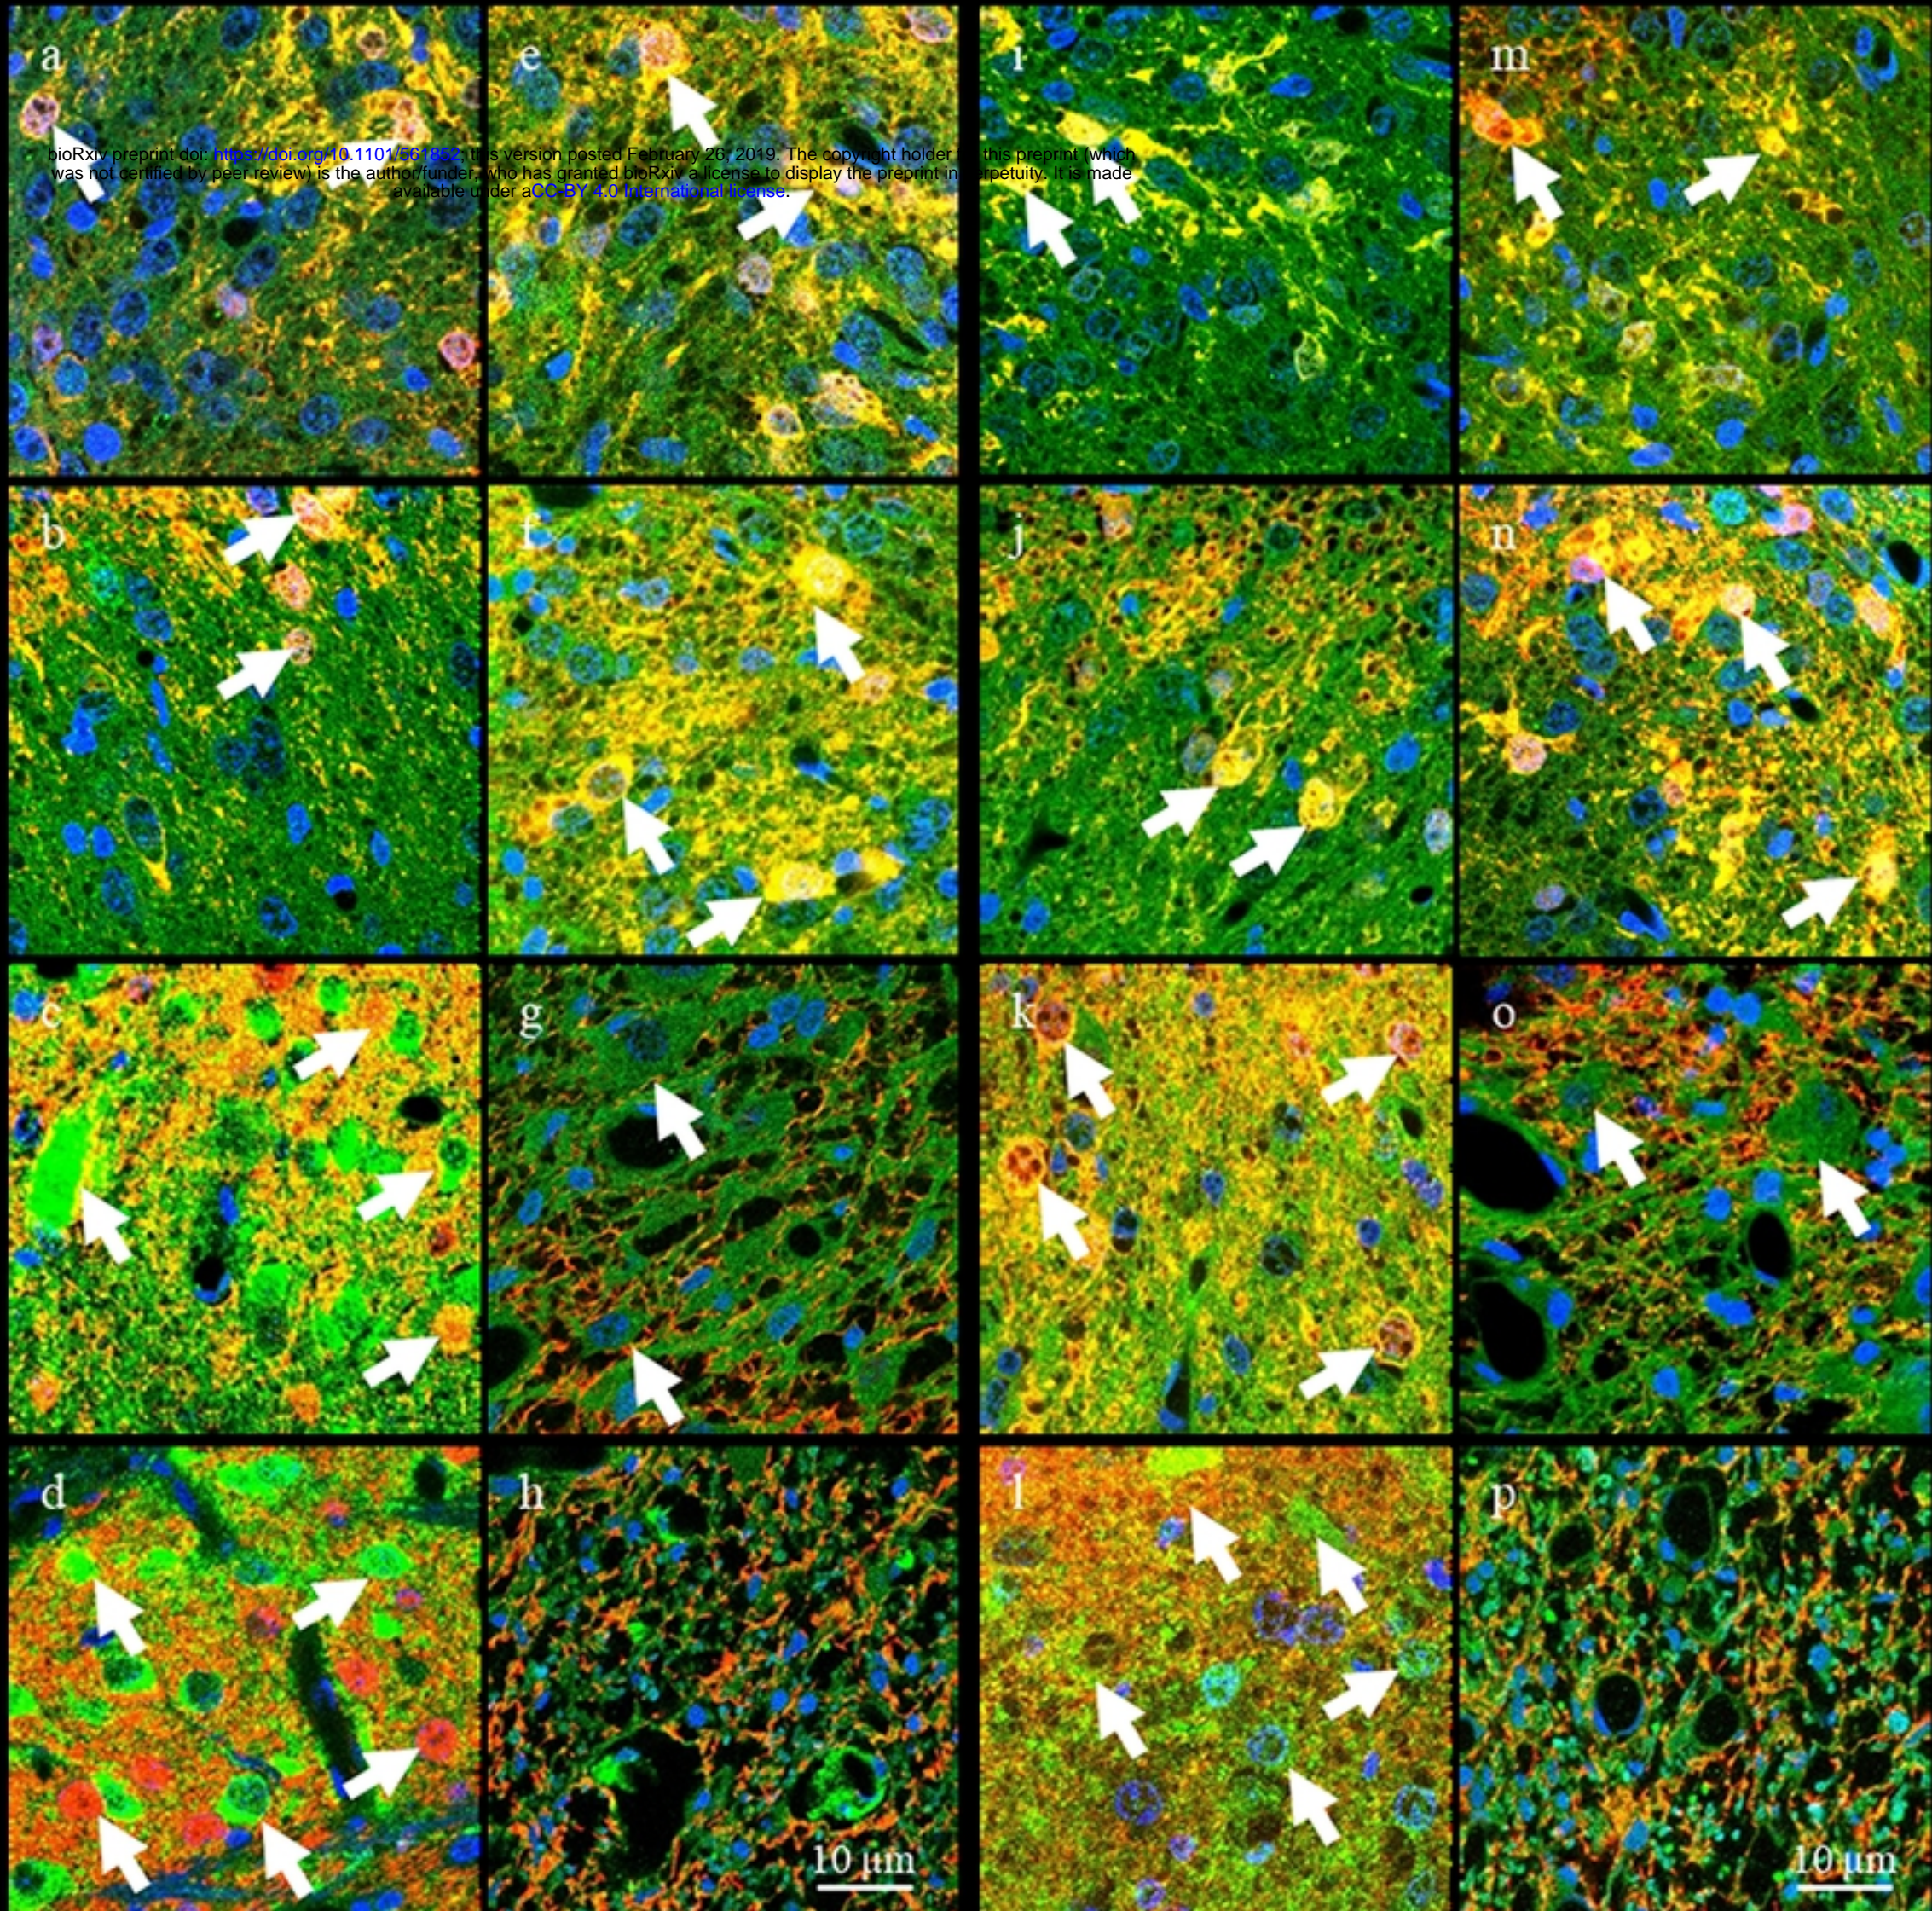**Figure 6**



**CB****Caspase-3**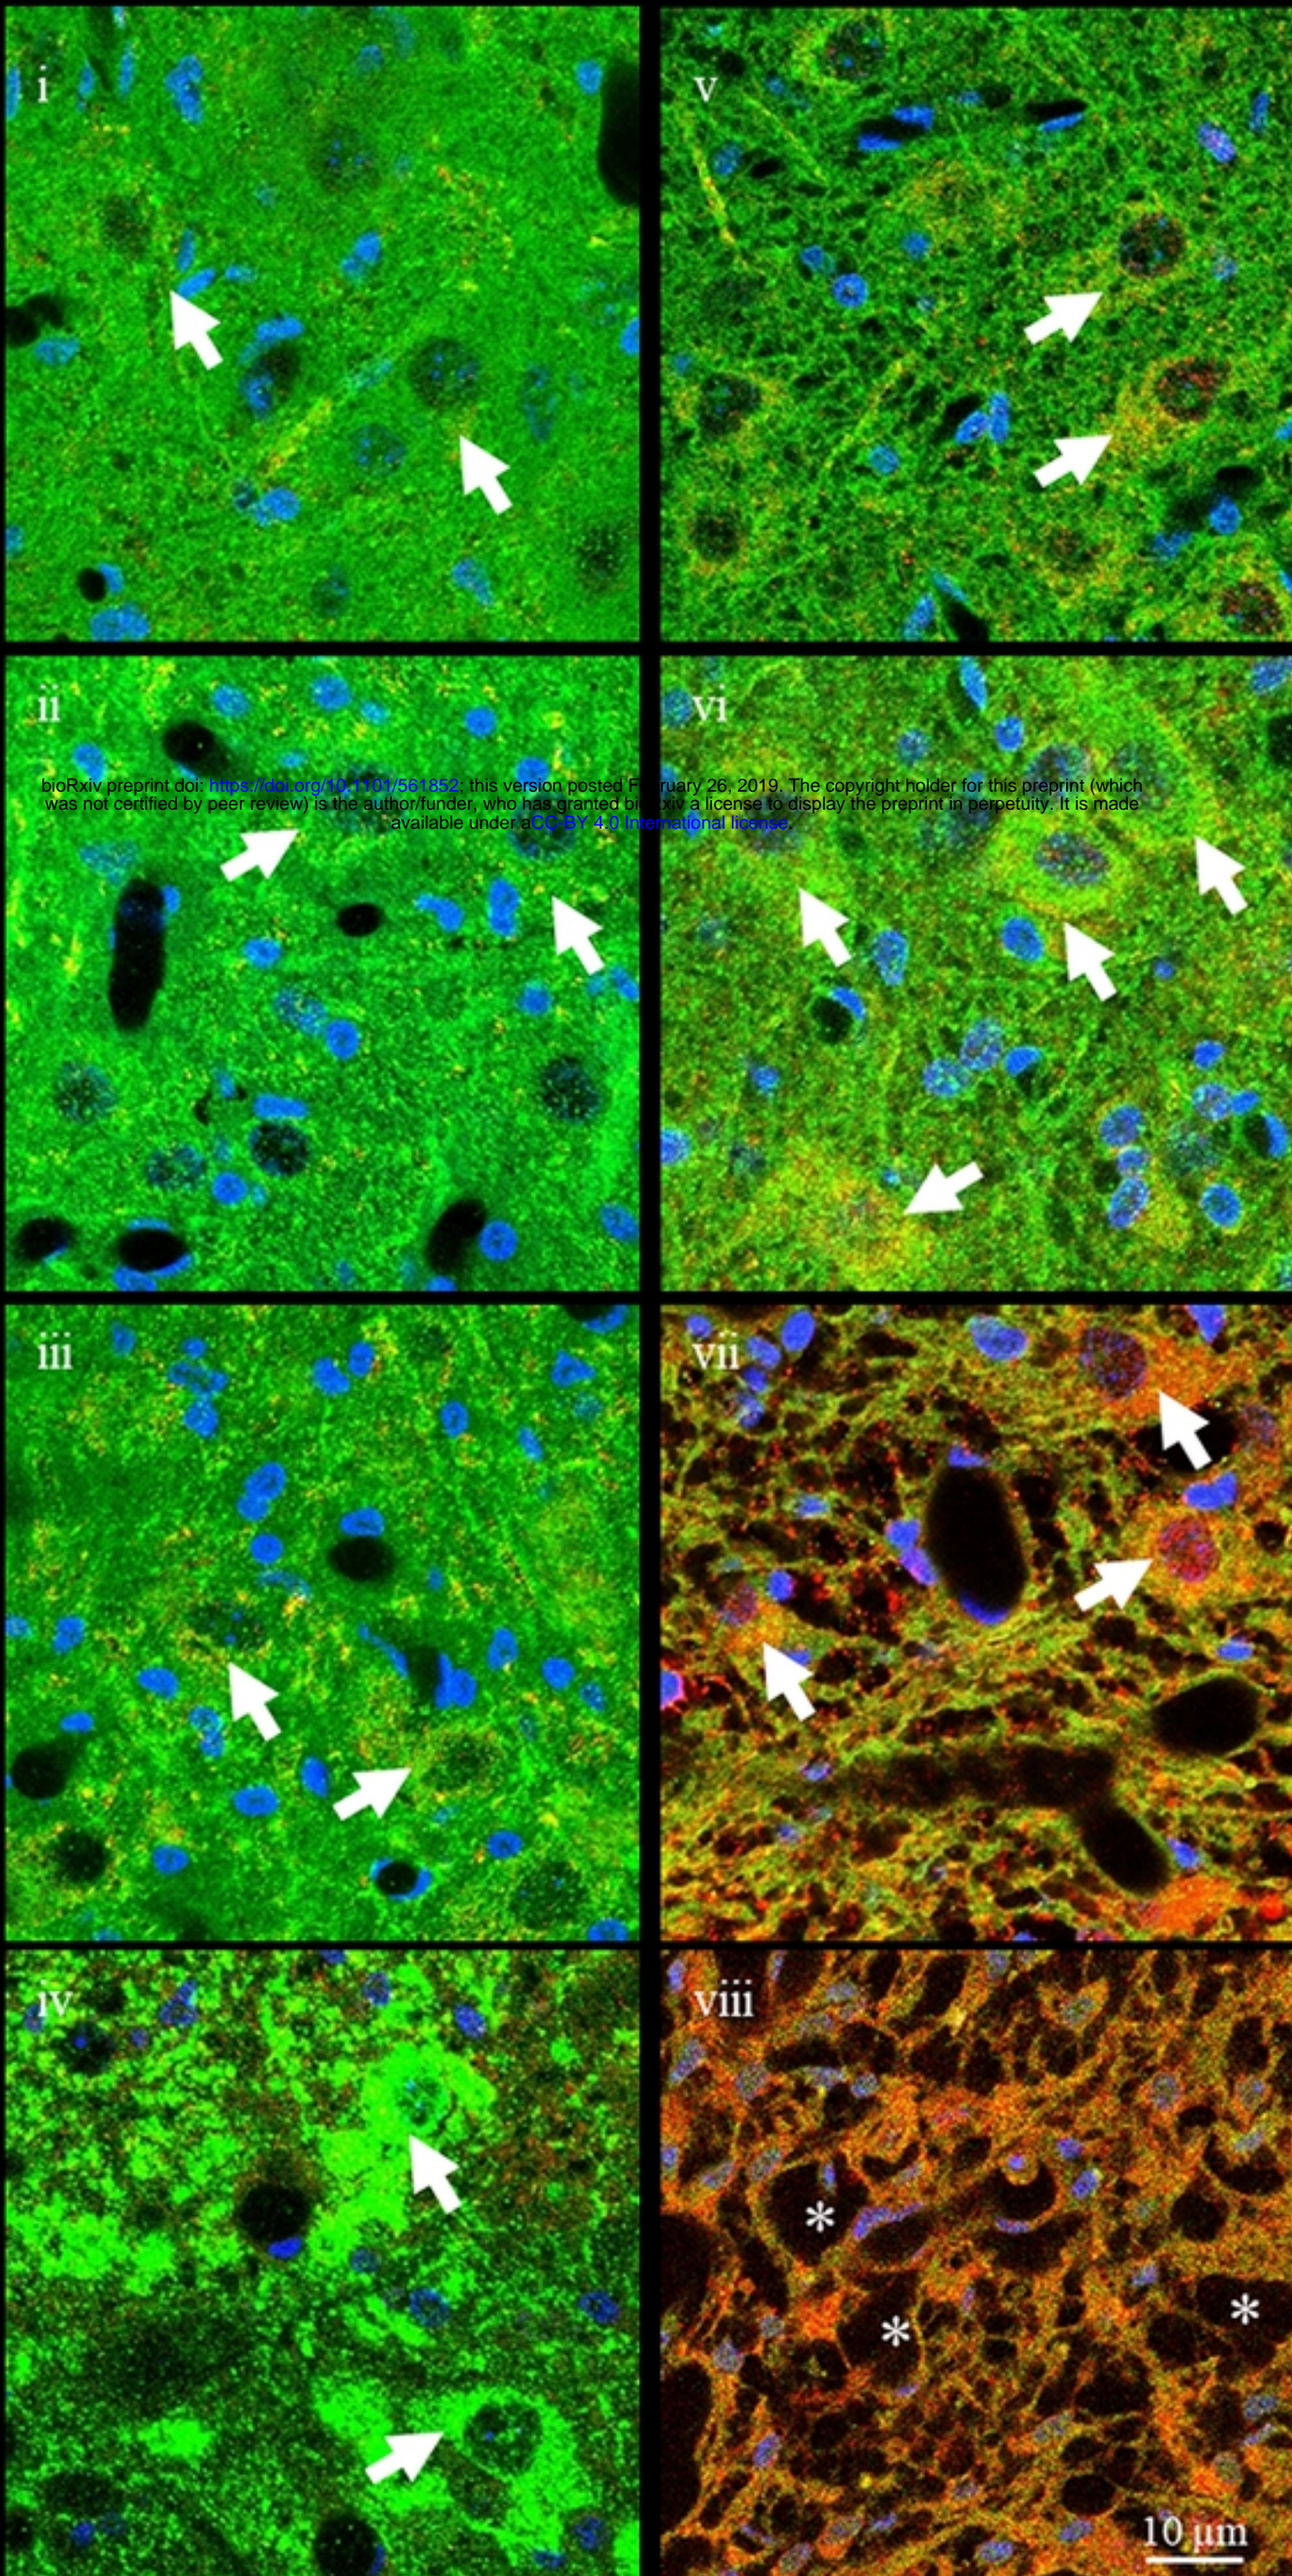**Figure 7**
